# Supplementary material for: Mapping the Interactome of a Major Mammalian Endoplasmic Reticulum Heat Shock Protein 90
Source: PubMed Central journal article supplement (PMC5215799; doi:10.1371/journal.pone.0169260), 2017-01-05
Supplement: pone.0169260.s001.pdf [file pone.0169260.s001.pdf]

**S1 Table: Reduced PM proteins in gp96 KO BMDMs**

| Accession | Gene Symbol | MW     | PI    | Hydro      | KO/WT ratio | StdDev | peptide count | UniqPep Count | aa Coverage |
|-----------|-------------|--------|-------|------------|-------------|--------|---------------|---------------|-------------|
| Q60875    | Arhgef2     | 68585  | 9.2   | -0.1317952 | 0.67        | 0.01   | 2             | 1             | 1.50%       |
| Q9QZB7    | Actr10      | 46222  | 7.54  | 0.090048   | 0.52        | 0.16   | 2             | 1             | 3.40%       |
| Q9CTG6    | Atp13a2     | 126614 | 8.49  | 0.1632678  | 0.56        | 0      | 1             | 1             | 1.70%       |
| P05555    | Itgam       | 127481 | 6.87  | 0.0362099  | 0.91        | 0.14   | 30            | 5             | 8.10%       |
| P24270    | Cat         | 59634  | 7.72  | -0.0671103 | 0.65        | 0.1    | 3             | 2             | 4.70%       |
| Q62192    | Cd180       | 74267  | 5.53  | 0.1115129  | 0.69        | 0.29   | 21            | 6             | 12.60%      |
| Q6SJQ7    | Cd300lf     | 30777  | 4.72  | 0.1085512  | 0.63        | 0.19   | 2             | 1             | 9.20%       |
| P56391    | Cox6b1      | 9940   | 8.97  | -0.1471765 | 0.33        | 0      | 1             | 1             | 12.80%      |
| Q80YE7    | Dapk1       | 161442 | 6.43  | 0.0006449  | 0.69        | 0      | 1             | 1             | 1.20%       |
| Q8C2K1    | Def6        | 73437  | 6.1   | -0.2378411 | 0.55        | 0      | 1             | 1             | 2.70%       |
| Q6PAL8    | Dennd5a     | 146653 | 6.25  | -0.0112044 | 0.53        | 0      | 1             | 1             | 0.90%       |
| P11835    | Itgb2       | 85026  | 7.02  | -0.0514656 | 0.81        | 0.14   | 69            | 9             | 15.70%      |
| Q9QZD8    | Slc25a10    | 31715  | 9.43  | 0.0916028  | 0.46        | 0      | 1             | 1             | 5.20%       |
| Q3UH60    | Dip2b       | 83516  | 7.26  | 0.0938423  | 0.63        | 0      | 1             | 2             | 2.20%       |
| O08553    | Dpysl2      | 62170  | 5.95  | 0.0343707  | 0.68        | 0      | 1             | 1             | 2.80%       |
| Q8BFR5    | Tufm        | 47222  | 7.65  | 0.0425517  | 0.67        | 0      | 1             | 1             | 2.70%       |
| Q6PGF7    | Exoc8       | 81035  | 5.29  | -0.0654888 | 0.66        | 0      | 1             | 1             | 2.00%       |
| Q7M759    | Fam108b1    | 10468  | 5.02  | 0.0559341  | 0.60        | 0.17   | 2             | 1             | 5.59%       |
| Q8BHZ0    | Fam49a      | 37343  | 5.71  | -0.0377709 | 0.61        | 0      | 1             | 1             | 6.80%       |
| P39749    | Fen1        | 42315  | 8.54  | -0.1021429 | 0.48        | 0      | 1             | 1             | 6.90%       |
| P97379    | G3bp2       | 54088  | 5.44  | -0.1870953 | 0.59        | 0.14   | 2             | 1             | 2.50%       |
| Q8JZK9    | Hmgcs1      | 57553  | 5.65  | 0.0063077  | 0.62        | 0      | 1             | 1             | 1.90%       |
| Q91VB4    | Hps3        | 113152 | 5.4   | 0.0698903  | 0.69        | 0      | 1             | 1             | 1.60%       |
| P07901    | Hsp90aa1    | 84657  | 4.93  | -0.1453687 | 0.63        | 0      | 2             | 2             | 4.00%       |
| Q00651    | Itga4       | 115696 | 6.28  | 0.0395188  | 0.61        | 0.11   | 5             | 3             | 4.70%       |
| P24063    | Itgal       | 128344 | 5.75  | 0.0397507  | 0.50        | 0.01   | 3             | 1             | 1.50%       |
| P43406    | Itgav       | 115278 | 5.46  | 0.0360537  | 0.69        | 0.1    | 4             | 3             | 3.60%       |
| Q91ZX7    | Lrp1        | 504742 | 5.14  | -0.0668135 | 0.43        | 0.2    | 80            | 20            | 6.60%       |
| A1L314    | Mpeg1       | 73167  | 5.91  | 0.0667777  | 0.63        | 0.32   | 44            | 6             | 16.70%      |
| Q9R1X5    | Abcc5       | 161130 | 8.87  | 0.0638162  | 0.49        | 0.01   | 2             | 1             | 1.90%       |
| Q8K2T1    | Nmral1      | 34376  | 6.37  | -0.0073139 | 0.60        | 0      | 1             | 1             | 5.20%       |
| Q8CIH5    | Plcg2       | 147592 | 6.34  | -0.1078496 | 0.64        | 0.48   | 2             | 2             | 2.70%       |
| Q99K51    | Pls3        | 70742  | 5.42  | -0.0064762 | 0.69        | 0      | 1             | 1             | 3.80%       |
| Q8BJY1    | Psmc5       | 55841  | 5.13  | 0.054175   | 0.65        | 0.08   | 2             | 1             | 3.20%       |
| O08603    | Raet1b      | 28625  | 9.18  | 0.0003952  | 0.59        | 0      | 1             | 1             | 3.60%       |
| P08556    | Nras        | 21199  | 5.01  | -0.0346032 | 0.69        | 0      | 1             | 1             | 7.90%       |
| P62717    | Rpl18a      | 20732  | 10.72 | -0.1981818 | 0.61        | 0      | 1             | 1             | 8.50%       |
| P58283    | Rnf216      | 83612  | 4.81  | -0.0537568 | 0.33        | 0      | 1             | 1             | 1.60%       |
| P62983    | Rps27a      | 9404   | 9.86  | -0.39175   | 0.63        | 0      | 2             | 1             | 8.30%       |
| P62908    | Rps3        | 29754  | 9.75  | -0.148137  | 0.69        | 0      | 1             | 1             | 4.90%       |
| Q64213    | Sf1         | 70408  | 8.98  | -0.0713936 | 0.60        | 0      | 1             | 1             | 1.80%       |
| P07214    | Sparc       | 34450  | 4.77  | -0.0127815 | 0.65        | 0      | 1             | 1             | 4.00%       |
| O70309    | Itgb5       | 87909  | 5.81  | -0.010401  | 0.71        | 0.05   | 3             | 1             | 2.10%       |
| Q8BYC6    | Taok3       | 37090  | 6.28  | -0.0015124 | 0.50        | 0      | 1             | 1             | 0.90%       |
| Q922F4    | Tubb6       | 50090  | 4.8   | 0.0175839  | 0.62        | 0.14   | 5             | 1             | 3.80%       |
| Q6R5N8    | Tlr13       | 114443 | 8.85  | 0.0648638  | 0.49        | 0.22   | 9             | 2             | 2.30%       |
| Q9QUN7    | Tlr2        | 89449  | 6.19  | 0.0603572  | 0.51        | 0.03   | 3             | 1             | 1.70%       |
| Q9QUK6    | Tlr4        | 95519  | 6.12  | 0.1033175  | 0.64        | 0      | 1             | 1             | 1.60%       |

|        |          |        |      |            |      |      |    |   |        |
|--------|----------|--------|------|------------|------|------|----|---|--------|
| Q8BVW3 | Trim14   | 51240  | 8.55 | -0.0754305 | 0.47 | 0    | 1  | 1 | 3.00%  |
| O88342 | Wdr1     | 66407  | 6.11 | 0.0525083  | 0.65 | 0.62 | 6  | 3 | 10.60% |
| Q92019 | Wdr7     | 163389 | 6.42 | 0.0586771  | 0.50 | 0    | 1  | 1 | 0.90%  |
| Q9JKF1 | Iqgap1   | 191312 | 6.15 | -0.0696981 | 0.65 | 0.11 | 41 | 6 | 4.90%  |
| Q6NXL1 | Sec24d   | 48661  | 7.94 | 0.0770507  | 0.46 | 0    | 1  | 1 | 1.60%  |
| Q8BGF0 | AW551984 | 85362  | 6.12 | 0.0444954  | 0.58 | 0    | 1  | 1 | 2.00%  |
| Q8CGC6 | Rbm28    | 56311  | 9.67 | -0.2669798 | 0.48 | 0.15 | 3  | 1 | 2.50%  |

**S1 Table : Reduced PM proteins in gp96 KO BMDMs.** 1034 genes were obtained from BMDM ICAT protein profiling, and then selected with a heavy (KO)/light (WT) ratio less than 0.7. 55 selected genes were input into search engine for GO annotation enrichment.
