# Supplementary material for: Mapping the Interactome of a Major Mammalian Endoplasmic Reticulum Heat Shock Protein 90
Source: PubMed Central journal article supplement (PMC5215799; doi:10.1371/journal.pone.0169260), 2017-01-05
Supplement: pone.0169260.s002.pdf [file pone.0169260.s002.pdf]

**S2 Table: Increased PM proteins in gp96 KO BMDMs**

| Accession | Gene Symbol | MW     | PI   | Hydro      | KO/WT | StdDev | peptide count | Unique Peptide | aa Coverage |
|-----------|-------------|--------|------|------------|-------|--------|---------------|----------------|-------------|
| P41233    | Abca1       | 166966 | 5.33 | 0.0827334  | 1.72  | 0      | 2             | 2              | 1.10%       |
| Q9DBE8    | Alg2        | 47405  | 8.2  | 0.0433494  | 1.61  | 0      | 2             | 1              | 3.60%       |
| Q6P1H6    | Ankle2      | 80564  | 6.42 | -0.0884457 | 1.69  | 0      | 2             | 1              | 1.20%       |
| Q9JKW0    | Arl6ip1     | 23437  | 9.38 | 0.1420197  | 1.61  | 0.09   | 8             | 2              | 4.90%       |
| Q91YI4    | Arrb2       | 46314  | 7.58 | -0.0777317 | 2     | 0.38   | 2             | 1              | 8.30%       |
| Q9EPE9    | Atp13a1     | 132378 | 8.35 | 0.1109252  | 1.75  | 0      | 2             | 1              | 1.50%       |
| Q02105    | C1qc        | 25966  | 8.67 | 0.080813   | 1.79  | 0      | 2             | 1              | 4.90%       |
| P14211    | Calr        | 47995  | 4.33 | -0.1623077 | 1.59  | 0.17   | 20            | 4              | 14.20%      |
| O35350    | Capn1       | 82106  | 5.62 | -0.03108   | 2.86  | 0      | 2             | 1              | 3.20%       |
| P23198    | Cbx3        | 20855  | 5.13 | -0.2287432 | 5     | 0      | 2             | 1              | 6.60%       |
| Q8CIX9    | Cd72        | 40493  | 6.36 | -0.2247518 | 1.54  | 0      | 2             | 1              | 6.50%       |
| Q99LL3    | Chst12      | 49398  | 7.74 | -0.0523389 | 4.55  | 0      | 2             | 1              | 2.40%       |
| Q8BRT1    | Clasp2      | 140739 | 8.84 | -0.0839345 | 1.75  | 0      | 2             | 1              | 1.20%       |
| Q6QLQ4    | Clec7a      | 27564  | 6.83 | -0.0234017 | 2.33  | 0      | 2             | 1              | 4.50%       |
| P59108    | Cpne2       | 61036  | 5.62 | 0.0573358  | 1.52  | 0.18   | 5             | 1              | 4.60%       |
| O88456    | Capns1      | 28463  | 5.41 | 0.106617   | 1.52  | 0      | 2             | 1              | 7.10%       |
| P07141    | Csf1        | 60649  | 5.1  | -0.0772464 | 1.61  | 0.2    | 5             | 1              | 2.50%       |
| P09581    | Csf1r       | 109179 | 5.84 | 0.0407062  | 3.03  | 0      | 2             | 1              | 1.90%       |
| Q8BG67    | Efr3a       | 94146  | 6.98 | -0.0078966 | 1.67  | 0      | 2             | 1              | 1.60%       |
| P26151    | Fcgr1       | 44888  | 5.73 | 0.0568812  | 1.72  | 0.07   | 4             | 1              | 6.70%       |
| Q8R1W2    | Gsg1        | 40613  | 5.82 | 0.126137   | 4.17  | 0      | 2             | 1              | 5.20%       |
| P01897    | H2-D1       | 40620  | 5.3  | 0.002873   | 1.92  | 0      | 3             | 3              | 13.80%      |
| P06339    | H2-T23      | 40875  | 5.91 | -0.0172829 | 1.75  | 0.05   | 3             | 1              | 2.80%       |
| P14428    | H2-K1       | 41302  | 5.96 | 0.002873   | 1.96  | 0.11   | 2             | 3              | 13.80%      |
| Q64345    | Ifit3       | 47223  | 5.51 | -0.1963771 | 1.92  | 0      | 2             | 1              | 4.00%       |
| P20444    | Prkca       | 76721  | 6.76 | -0.0515052 | 1.69  | 0.02   | 2             | 1              | 2.10%       |
| P48025    | Syk         | 71376  | 7.92 | -0.0344833 | 1.52  | 0.09   | 3             | 1              | 2.40%       |
| Q8BSS9    | Ppfia2      | 143234 | 5.79 | -0.1994274 | 1.64  | 0      | 2             | 1              | 1.20%       |
| P05533    | Ly6a        | 14377  | 4.75 | 0.1890298  | 1.67  | 0.09   | 2             | 1              | 15.70%      |
| Q9JMH9    | Myo18a      | 230908 | 5.84 | -0.1874886 | 1.52  | 0      | 2             | 1              | 0.50%       |
| Q9QWR8    | Naga        | 47235  | 6.02 | 0.0748915  | 1.64  | 0      | 2             | 1              | 2.90%       |
| Q61194    | Pik3c2a     | 187440 | 8.55 | -0.00231   | 1.96  | 0      | 2             | 1              | 0.70%       |
| P09103    | P4hb        | 57144  | 4.79 | -0.0068762 | 2     | 0      | 2             | 1              | 1.40%       |
| Q922R8    | Pdia6       | 48689  | 5.05 | 0.0281573  | 1.64  | 0.41   | 6             | 2              | 5.70%       |
| Q8VD65    | Pik3r4      | 72393  | 5.58 | 0.0142543  | 3.03  | 0      | 2             | 1              | 0.90%       |
| P70182    | Pip5k1a     | 60471  | 8.74 | -0.020989  | 1.96  | 0      | 2             | 1              | 2.20%       |
| O70161    | Pip5k1c     | 72474  | 5.41 | -0.0337368 | 1.59  | 0      | 2             | 1              | 1.80%       |
| Q8BG07    | Pld4        | 53390  | 8.41 | 0.069125   | 1.79  | 0.19   | 4             | 1              | 4.80%       |
| Q9JKF6    | Pvrl1       | 57064  | 6.06 | -0.019301  | 1.82  | 0.03   | 2             | 1              | 2.50%       |
| Q9QYF1    | Rdh11       | 35148  | 9.1  | 0.1085759  | 1.54  | 0.12   | 3             | 1              | 3.80%       |
| Q9WVM1    | Racgap1     | 70158  | 8.78 | -0.0777547 | 1.89  | 0.22   | 2             | 2              | 4.00%       |
| Q6KAT6    | Siglec1     | 33190  | 5.3  | -0.0145763 | 2.04  | 0.14   | 35            | 9              | 10.90%      |
| Q5FWI3    | Tmem2       | 153815 | 7.88 | -0.0008171 | 1.59  | 0      | 1             | 1              | 0.90%       |
| Q9CR67    | Tmem33      | 28031  | 9.72 | 0.1814171  | 1.54  | 0      | 1             | 1              | 6.90%       |
| O35305    | Tnfrsf11a   | 66621  | 4.94 | -0.022896  | 1.59  | 0      | 1             | 1              | 2.90%       |
| Q9D8Y7    | Tnfaip8l2   | 20615  | 7.79 | -0.0008696 | 1.96  | 0.11   | 2             | 1              | 7.60%       |
| Q80X50    | Ubap2l      | 107242 | 6.62 | -0.0692008 | 1.85  | 0.05   | 4             | 1              | 1.60%       |
| Q6P5E4    | Ugcgl1      | 176553 | 5.38 | 0.007853   | 1.85  | 0      | 1             | 1              | 0.80%       |
| Q8R5L3    | Vps39       | 101693 | 6.53 | 0.01693    | 2     | 0.31   | 2             | 1              | 1.70%       |

**S2 Table: Increased PM proteins in gp96 KO BMDMs.** 1034 genes were obtained from BMDM ICAT protein profiling, and then selected with a heavy (KO)/light (WT) ratio more than 1.5. 49 selected genes were input into search engine for GO annotation enrichment.
