# Supplementary material for: Mapping the Interactome of a Major Mammalian Endoplasmic Reticulum Heat Shock Protein 90
Source: PubMed Central journal article supplement (PMC5215799; doi:10.1371/journal.pone.0169260), 2017-01-05
Supplement: pone.0169260.s003.pdf [file pone.0169260.s003.pdf]

**S3 Table: Comparison of PM protein levels of gp96 WT and KO BMDMs**

|       | spot number | protein hit number | Accession   | gene ID   | gene name  | score | peptide matches | number_matched (<0.05) | identify       |
|-------|-------------|--------------------|-------------|-----------|------------|-------|-----------------|------------------------|----------------|
| WT>KO | 1           | 1                  | IPI00465786 | 21894;    | Tln1;      | 805   | 21              | 17                     | identification |
| WT>KO | 2           | 1                  | IPI00465786 | 21894;    | Tln1;      | 371   | 11              | 10                     | identification |
| WT>KO | 3           | 1                  | IPI00319509 | 16790;    | Anpep;     | 639   | 16              | 14                     | identification |
| WT>KO | 4           | 1                  | IPI00120674 | 16409;    | Iltgam;    | 796   | 16              | 15                     | identification |
| WT>KO | 5           | 1                  | IPI00120674 | 16409;    | Iltgam;    | 718   | 15              | 15                     | identification |
| WT>KO | 6           | 1                  | IPI00129526 | 22027;    | Hsp90b1;   | 574   | 21              | 15                     | identification |
| WT>KO | 7           | 1                  | IPI00222828 | 13132;    | Dab2;      | 337   | 8               | 5                      | identification |
| WT>KO | 7           | 2                  | IPI00330695 | 227737;   | 9130404D14 | 248   | 12              | 5                      | identification |
| WT>KO | 8           | 1                  | IPI00222828 | 13132;    | Dab2;      | 375   | 12              | 8                      | identification |
| WT>KO | 8           | 2                  | IPI00753430 | 227737;   | 9130404D14 | 65    | 1               | 1                      | candidate      |
| KO>WT | 9           | 1                  | IPI00751595 | 212032;   | Hk3;       | 348   | 9               | 6                      | identification |
| WT>KO | 10          | 1                  | IPI00222828 | 13132;    | Dab2;      | 686   | 17              | 12                     | identification |
| KO>WT | 11          | 1                  | IPI00229080 | 15516;    | Hsp90ab1;  | 615   | 20              | 13                     | identification |
| KO>WT | 11          | 1                  | IPI00330804 | 15519;    | Hsp90aa1;  | 368   | 10              | 6                      | identification |
| KO>WT | 12          | 1                  | IPI00228150 | 76614;    | Immt;      | 253   | 10              | 8                      | identification |
| KO>WT | 12          | 2                  | IPI00458392 | 69748;    | Aldh16a1;  | 70    | 3               | 1                      | candidate      |
| KO>WT | 13          | 1                  | IPI00228150 | 76614;    | Immt;      | 371   | 9               | 8                      | identification |
| KO>WT | 14          | 1                  | IPI00228150 | 76614;    | Immt;      | 146   | 5               | 5                      | identification |
| KO>WT | 15          | 1                  | IPI00319992 | 14828;    | Hspa5;     | 1553  | 23              | 23                     | identification |
| KO>WT | 16          | 1                  | IPI00133903 | 15526;    | Hspa9;     | 748   | 18              | 12                     | identification |
| KO>WT | 17          | 1                  | IPI00133903 | 15526;    | Hspa9;     | 685   | 16              | 11                     | identification |
| KO>WT | 18          | 1                  | IPI00331182 | 14571;    | Gpd2;      | 299   | 15              | 7                      | identification |
| WT>KO | 19          | 1                  | IPI00133317 | 20911;    | Stxbp2;    | 652   | 17              | 9                      | identification |
| KO>WT | 20          | 1                  | IPI00137409 | 21881;    | Tkt;       | 265   | 8               | 6                      | identification |
| KO>WT | 21          | 1                  | IPI00137409 | 21881;    | Tkt;       | 732   | 18              | 14                     | identification |
| KO>WT | 22          | 1                  | IPI00318671 | 98878;    | Ehd4;      | 611   | 18              | 13                     | identification |
| WT>KO | 23          | 1                  | IPI00624098 | 20912;    | Stxbp3a;   | 250   | 11              | 7                      | identification |
| KO>WT | 24          | 1                  | IPI00129577 | 26926;    | Aifm1;     | 175   | 6               | 5                      | identification |
| WT>KO | 25          | 1                  | IPI00312058 | 12359;    | Cat;       | 323   | 13              | 7                      | identification |
| KO>WT | 26          | 1                  | IPI00221608 | 68653;    | Samm50;    | 353   | 9               | 8                      | identification |
| KO>WT | 27          | 1                  | IPI00130280 | 11946;    | Atp5a1;    | 862   | 18              | 16                     | identification |
| KO>WT | 28          | 1                  | IPI00130280 | 11946;    | Atp5a1;    | 1000  | 20              | 18                     | identification |
| WT>KO | 29          | 1                  | IPI00313672 | 16985;    | Lsp1;      | 324   | 9               | 8                      | identification |
| KO>WT | 30          | 1                  | IPI00468481 | 11947;    | Atp5b;     | 912   | 19              | 15                     | identification |
| KO>WT | 31          | 1                  | IPI00420385 | 52398;    | Sept11;    | 315   | 10              | 7                      | identification |
| KO>WT | 31          | 2                  | IPI00124372 | 56752;    | Aldh9a1;   | 206   | 6               | 5                      | identification |
| KO>WT | 31          | 2                  | IPI00115708 | 18718;    | Pip5k2a;   | 87    | 1               | 1                      | candidate      |
| KO>WT | 32          | 1                  | IPI00462072 | 00044223; | Eno1       | 744   | 15              | 13                     | identification |
| KO>WT | 32          | 2                  | IPI00112053 | 69178;    | Snx5;      | 150   | 4               | 3                      | identification |
| KO>WT | 33          | 1                  | IPI00318841 | 67160;    | Eef1g;     | 241   | 10              | 10                     | identification |
| KO>WT | 34          | 1                  | IPI00307837 | 13627;    | Eef1a1;    | 416   | 10              | 7                      | identification |
| KO>WT | 35          | 1                  | IPI00468924 | 229731;   | Slc25a24;  | 258   | 14              | 7                      | identification |
| WT>KO | 36          | 1                  | IPI00277930 | 12332;    | Capg;      | 255   | 5               | 3                      | identification |
| WT>KO | 36          | 2                  | IPI00469307 | 16976;    | Lrpap1;    | 95    | 7               | 1                      | candidate      |
| KO>WT | 37          | 1                  | IPI00119138 | 67003;    | Uqcrc2;    | 157   | 7               | 4                      | identification |
| WT>KO | 38          | 1                  | IPI00230395 | 16952;    | Anxa1;     | 654   | 17              | 11                     | identification |
| WT>KO | 39          | 1                  | IPI00230395 | 16952;    | Anxa1;     | 746   | 16              | 15                     | identification |
| WT>KO | 40          | 1                  | IPI00111265 | 12343;    | Capza2;    | 503   | 9               | 7                      | identification |
| WT>KO | 41          | 1                  | IPI00162780 | 14693;    | Gnb2;      | 137   | 5               | 3                      | identification |
| WT>KO | 41          | 2                  | IPI00120716 | 14688;    | Gnb1;      | 89    | 4               | 3                      | identification |
| KO>WT | 42          | 1                  | IPI00122547 | 22334;    | Vdac2;     | 401   | 6               | 6                      | identification |

|       |    |   |             |         |            |     |    |    |                |
|-------|----|---|-------------|---------|------------|-----|----|----|----------------|
| WT>KO | 43 | 1 | IPI00661414 | 76709;  | Arpc2;     | 593 | 13 | 11 | identification |
| WT>KO | 44 | 1 | IPI00230395 | 16952;  | Anxa1;     | 259 | 6  | 5  | identification |
| WT>KO | 44 | 2 | IPI00120051 | 16854;  | Lgals3;    | 144 | 4  | 4  | identification |
| WT>KO | 45 | 1 | IPI00131259 | 16854;  | Lgals3;    | 343 | 7  | 7  | identification |
| WT>KO | 46 | 1 | IPI00474883 | 12345;  | Capzb;     | 278 | 10 | 9  | identification |
| KO>WT | 47 | 1 | IPI00133440 | 18673;  | Phb;       | 562 | 7  | 7  | identification |
| KO>WT | 48 | 1 | IPI00230507 | 71679;  | Atp5h;     | 483 | 7  | 7  | identification |
| KO>WT | 49 | 1 | IPI00121788 | 18477;  | Prdx1;     | 700 | 17 | 15 | identification |
| KO>WT | 50 | 1 | IPI00121788 | 18477;  | Prdx1;     | 571 | 17 | 16 | identification |
| WT>KO | 51 | 1 | IPI00751340 | 21346;  | Tagln2;    | 336 | 12 | 9  | identification |
| WT>KO | 52 | 1 | IPI00751340 | 21346;  | Tagln2;    | 353 | 12 | 11 | identification |
| KO>WT | 53 | 1 | IPI00122565 | 14569;  | Gdi2;      | 357 | 14 | 11 | identification |
| KO>WT | 54 | 1 | IPI00128023 | 226646; | Ndufs2;    | 199 | 14 | 7  | identification |
| KO>WT | 54 | 2 | IPI00221998 | 71881;  | 2310001A20 | 61  | 4  | 1  | candidate      |
| WT>KO | 55 | 1 | IPI00117011 | 15163;  | Hcls1;     | 605 | 15 | 12 | identification |

**S3 Table: Comparison of PM protein levels of gp96 WT and KO BMDMs.** 2-DE imagine quantitation and MS/MS analysis was carried out as described in Methods. 55 spots were analyzed, and shown in blue with protein level of WT BMDMs greater than that of KO BMDMs (WT>KO), otherwise, shown in red with KO>WT.
