# Supplementary material for: Mapping the Interactome of a Major Mammalian Endoplasmic Reticulum Heat Shock Protein 90
Source: PubMed Central journal article supplement (PMC5215799; doi:10.1371/journal.pone.0169260), 2017-01-05
Supplement: pone.0169260.s004.pdf [file pone.0169260.s004.pdf]

**S4 Table: The list of reduced proteins in gp96 KO B cells**

| Accession | Gene Symbol | WT peptide | Normalized.S C.wt. | KO peptide | NormalizedS C.ko. | WT/KO ratio | MW     | pI    | Hydro      | Unique Peptide | aa Coverage |
|-----------|-------------|------------|--------------------|------------|-------------------|-------------|--------|-------|------------|----------------|-------------|
| P55194    | Sh3bp1      | 3          | 0.00024            | 0          | 0                 | 0           | 65285  | 5.49  | -0.0370216 | 2              | 4.70%       |
| P48193    | Epb41       | 3          | 0.00024            | 0          | 0                 | 0           | 95911  | 5.44  | -0.1544987 | 1              | 1.60%       |
| P56379    | Mp68        | 3          | 0.00024            | 0          | 0                 | 0           | 6698   | 10    | 0.10258622 | 1              | 13.80%      |
| Q9CQ60    | Pgls        | 11         | 0.00088            | 5          | 0.00052           | 2.2         | 27254  | 5.55  | 0.13389108 | 6              | 44.00%      |
| Q61548    | Snap91      | 2          | 0.00016            | 0          | 0.00000           | 0           | 91851  | 4.72  | 0.13849086 | 1              | 1.30%       |
| P51912    | Slc1a5      | 3          | 0.00024            | 0          | 0.00000           | 0           | 58483  | 8.14  | 0.24683544 | 1              | 3.60%       |
| Q61102    | Abcb7       | 3          | 0.00024            | 0          | 0.00000           | 0           | 82581  | 9.36  | 0.06853733 | 2              | 2.70%       |
| Q8CBW3    | Abi1        | 2          | 0.00016            | 0          | 0.00000           | 0           | 52288  | 7.16  | -0.0602702 | 1              | 3.30%       |
| Q8BYZ1    | Abi3        | 4          | 0.00032            | 0          | 0.00000           | 0           | 39107  | 5.4   | 0.05029973 | 3              | 9.30%       |
| Q9R0X4    | Acot9       | 5          | 0.00040            | 2          | 0.00021           | 2.5         | 50560  | 8.74  | -0.0203417 | 2              | 5.50%       |
| Q8R5C5    | Actr1b      | 2          | 0.00016            | 0          | 0.00000           | 0           | 42281  | 5.98  | 0.01388297 | 2              | 10.10%      |
| Q8BK64    | Ahsa1       | 2          | 0.00016            | 0          | 0.00000           | 0           | 38117  | 5.41  | -0.0278107 | 2              | 11.80%      |
| P45376    | Akr1b1      | 2          | 0.00016            | 0          | 0.00000           | 0           | 35732  | 6.71  | 0.0365823  | 1              | 4.40%       |
| O08663    | Metap2      | 3          | 0.00024            | 0          | 0.00000           | 0           | 52922  | 5.56  | -0.0978871 | 3              | 11.30%      |
| O35639    | Anxa3       | 3          | 0.00024            | 0          | 0.00000           | 0           | 36384  | 5.5   | -0.0778019 | 2              | 5.30%       |
| P28352    | Apex1       | 18         | 0.00143            | 8          | 0.00083           | 2.25        | 35490  | 8.04  | -0.0767508 | 6              | 27.40%      |
| Q9WV32    | Arpc1b      | 30         | 0.00239            | 11         | 0.00114           | 2.73        | 41064  | 8.68  | 0.02989247 | 7              | 22.60%      |
| Q8CG76    | Akr7a2      | 2          | 0.00016            | 0          | 0.00000           | 0.00        | 40612  | 8.36  | -0.013188  | 2              | 7.10%       |
| Q61210    | Arhgef1     | 17         | 0.00135            | 8          | 0.00083           | 2.13        | 102805 | 5.43  | -0.1080434 | 10             | 16.20%      |
| Q8K4I3    | Arhgef6     | 2          | 0.00016            | 0          | 0.00000           | 0.00        | 87051  | 5.66  | -0.0577302 | 1              | 1.70%       |
| P54923    | Adprh       | 5          | 0.00040            | 0          | 0.00000           | 0.00        | 40068  | 5.46  | 0.06582873 | 3              | 17.40%      |
| Q99MK8    | Adrbk1      | 4          | 0.00032            | 0          | 0.00000           | 0.00        | 79639  | 6.89  | -0.0674746 | 2              | 3.00%       |
| O54984    | Asna1       | 2          | 0.00016            | 0          | 0.00000           | 0.00        | 38823  | 4.81  | 0.07031608 | 1              | 2.90%       |
| P01887    | B2m         | 14         | 0.00111            | 3          | 0.00031           | 4.67        | 13779  | 8.55  | 0.03176469 | 1              | 7.60%       |
| P13808    | Slc4a2      | 2          | 0.00016            | 0          | 0.00000           | 0.00        | 136814 | 5.78  | 0.04562672 | 2              | 2.70%       |
| O54962    | Banf1       | 5          | 0.00040            | 2          | 0.00021           | 2.50        | 10103  | 5.79  | -0.0723596 | 2              | 29.20%      |
| Q07813    | Bax         | 14         | 0.00111            | 3          | 0.00031           | 4.67        | 21395  | 4.86  | 0.0871354  | 3              | 24.00%      |
| Q8K019    | Bclaf1      | 2          | 0.00016            | 0          | 0.00000           | 0.00        | 106002 | 10    | -0.4671148 | 1              | 1.00%       |
| P70444    | Bid         | 2          | 0.00016            | 0          | 0.00000           | 0.00        | 21952  | 4.71  | -0.0458461 | 2              | 22.60%      |
| Q9Z0H1    | Wdr46       | 2          | 0.00016            | 0          | 0.00000           | 0.00        | 69048  | 9.79  | -0.1121704 | 1              | 3.50%       |
| P16277    | Blk         | 9          | 0.00072            | 4          | 0.00042           | 2.25        | 56674  | 6.7   | 0.00444891 | 1              | 2.40%       |
| Q91ZU6    | Dst         | 2          | 0.00016            | 0          | 0.00000           | 0.00        | 833638 | 5.19  | -0.1184446 | 2              | 0.30%       |
| Q9WVA3    | Bub3        | 14         | 0.00111            | 6          | 0.00062           | 2.33        | 36955  | 6.37  | -0.0429448 | 4              | 19.60%      |
| Q9JJ80    | Rpf2        | 5          | 0.00040            | 2          | 0.00021           | 2.50        | 35364  | 10.05 | -0.1773856 | 2              | 8.50%       |
| Q62192    | Cd180       | 4          | 0.00032            | 0          | 0.00000           | 0.00        | 74302  | 5.55  | 0.10971265 | 2              | 5.30%       |
| Q61462    | Cyba        | 11         | 0.00088            | 3          | 0.00031           | 3.67        | 20748  | 9.32  | 0.13708338 | 1              | 14.60%      |
| Q61093    | Cybb        | 9          | 0.00072            | 2          | 0.00021           | 4.50        | 65305  | 7.83  | 0.11470182 | 6              | 13.70%      |
| O35744    | Chi3l3      | 3          | 0.00024            | 0          | 0.00000           | 0.00        | 44458  | 5.42  | 0.06844224 | 2              | 8.50%       |
| O35350    | Capn1       | 3          | 0.00024            | 0          | 0.00000           | 0.00        | 82106  | 5.62  | -0.03108   | 2              | 4.30%       |
| P47757    | Capzb       | 13         | 0.00103            | 6          | 0.00062           | 2.17        | 31345  | 5.47  | -0.0946571 | 7              | 32.50%      |
| P28293    | Ctsg        | 2          | 0.00016            | 0          | 0.00000           | 0.00        | 29096  | 10.57 | -0.0436399 | 1              | 4.20%       |
| Q08857    | Cd36        | 2          | 0.00016            | 0          | 0.00000           | 0.00        | 52698  | 8.6   | 0.0917161  | 1              | 2.50%       |
| P56528    | Cd38        | 8          | 0.00064            | 3          | 0.00031           | 2.67        | 34408  | 8.64  | 0.04868422 | 4              | 11.50%      |
| Q9Z0M6    | Cd97        | 7          | 0.00056            | 3          | 0.00031           | 2.33        | 90413  | 7.38  | 0.11443768 | 3              | 4.80%       |
| Q9QYB1    | Clic4       | 7          | 0.00056            | 3          | 0.00031           | 2.33        | 28729  | 5.44  | -0.0310672 | 3              | 26.90%      |
| Q08093    | Cnn2        | 8          | 0.00064            | 3          | 0.00031           | 2.67        | 33156  | 7.53  | -0.0200328 | 4              | 13.40%      |
| Q9DAW9    | Cnn3        | 6          | 0.00048            | 0          | 0.00000           | 0.00        | 36429  | 5.46  | -0.0448182 | 4              | 22.10%      |
| Q9DB96    | Ngdn        | 2          | 0.00016            | 0          | 0.00000           | 0.00        | 35659  | 9.59  | -0.2184762 | 1              | 4.40%       |
| Q61387    | Cox7a2l     | 3          | 0.00024            | 0          | 0.00000           | 0.00        | 12399  | 9.61  | 0.070991   | 2              | 40.50%      |
| Q63829    | Commf3      | 2          | 0.00016            | 0          | 0.00000           | 0.00        | 22037  | 5.36  | -0.0495898 | 1              | 5.10%       |
| O89079    | Cope        | 3          | 0.00024            | 0          | 0.00000           | 0.00        | 34567  | 4.94  | -0.0221429 | 2              | 10.70%      |
| P19536    | Cox5b       | 3          | 0.00024            | 0          | 0.00000           | 0.00        | 13813  | 8.69  | -0.0172656 | 1              | 8.60%       |
| P43024    | Cox6a1      | 2          | 0.00016            | 0          | 0.00000           | 0.00        | 12352  | 9.97  | -0.000991  | 1              | 16.20%      |

|        |           |     |         |    |         |      |        |       |            |    |        |
|--------|-----------|-----|---------|----|---------|------|--------|-------|------------|----|--------|
| P19070 | Cr2       | 3   | 0.00024 | 0  | 0.00000 | 0.00 | 112995 | 7.22  | 0.03824392 | 2  | 1.80%  |
| Q8VBV7 | Cops8     | 4   | 0.00032 | 0  | 0.00000 | 0.00 | 23256  | 5.09  | 0.07062201 | 3  | 20.10% |
| Q9DAT2 | Mrgbp     | 2   | 0.00016 | 0  | 0.00000 | 0.00 | 23888  | 4.87  | -0.0634404 | 1  | 6.00%  |
| O88712 | Ctbp1     | 2   | 0.00016 | 0  | 0.00000 | 0.00 | 47745  | 6.28  | 0.05133789 | 2  | 6.80%  |
| P56395 | Cyb5a     | 4   | 0.00032 | 0  | 0.00000 | 0.00 | 15241  | 4.96  | -0.0293284 | 3  | 22.40% |
| Q9CXW3 | Cacybp    | 4   | 0.00032 | 0  | 0.00000 | 0.00 | 26510  | 7.64  | -0.206856  | 3  | 21.80% |
| Q80YW0 | Cyth4     | 2   | 0.00016 | 0  | 0.00000 | 0.00 | 45285  | 6.24  | -0.0852417 | 1  | 3.60%  |
| Q9JIQ3 | Diablo    | 2   | 0.00016 | 0  | 0.00000 | 0.00 | 26820  | 6.03  | -0.0525738 | 1  | 8.40%  |
| P54823 | Ddx6      | 4   | 0.00032 | 0  | 0.00000 | 0.00 | 54192  | 8.85  | -0.0106625 | 3  | 9.70%  |
| Q9QX60 | Dguok     | 5   | 0.00040 | 0  | 0.00000 | 0.00 | 32281  | 7.17  | -0.0406498 | 3  | 21.70% |
| Q9CQA3 | Sdhb      | 5   | 0.00040 | 0  | 0.00000 | 0.00 | 31814  | 8.96  | -0.0615957 | 4  | 16.00% |
| Q8BZN6 | Dock10    | 32  | 0.00255 | 11 | 0.00114 | 2.91 | 245758 | 6.63  | -0.0512556 | 18 | 13.40% |
| Q8R1A4 | Dock7     | 3   | 0.00024 | 0  | 0.00000 | 0.00 | 83399  | 6.14  | 0.0513378  | 2  | 10.40% |
| Q8C147 | Dock8     | 15  | 0.00119 | 6  | 0.00062 | 2.50 | 238978 | 6.53  | -0.0371524 | 19 | 11.70% |
| P52431 | Pold1     | 2   | 0.00016 | 0  | 0.00000 | 0.00 | 123790 | 7.69  | -0.0260362 | 1  | 1.30%  |
| Q9QXB9 | Drg2      | 2   | 0.00016 | 0  | 0.00000 | 0.00 | 40718  | 9.03  | 0.01659341 | 1  | 3.60%  |
| P01882 | IGHDM     | 14  | 0.00111 | 5  | 0.00052 | 2.80 | 32389  | 6.49  | -5.84E-04  | 3  | 14.80% |
| Q9JHU4 | Dync1h1   | 103 | 0.00820 | 31 | 0.00322 | 3.32 | 532045 | 6.03  | -0.0352046 | 58 | 16.70% |
| O88487 | Dync1i2   | 2   | 0.00016 | 0  | 0.00000 | 0.00 | 68394  | 5.16  | -0.0887418 | 1  | 3.10%  |
| P57776 | Eef1d     | 11  | 0.00088 | 5  | 0.00052 | 2.20 | 31293  | 4.91  | -0.1303914 | 4  | 18.10% |
| Q9CZR8 | Tsfm      | 2   | 0.00016 | 0  | 0.00000 | 0.00 | 35334  | 6.62  | 0.02984567 | 1  | 8.30%  |
| Q8BHL5 | Elmo2     | 4   | 0.00032 | 0  | 0.00000 | 0.00 | 83887  | 5.65  | -0.0224727 | 4  | 9.80%  |
| P70290 | Mpp1      | 3   | 0.00024 | 0  | 0.00000 | 0.00 | 52227  | 6.72  | -0.0572103 | 3  | 12.40% |
| O08579 | Emd       | 2   | 0.00016 | 0  | 0.00000 | 0.00 | 29436  | 4.85  | -0.0555598 | 1  | 11.20% |
| P17182 | Eno1      | 10  | 0.00080 | 4  | 0.00042 | 2.50 | 47141  | 6.37  | 0.02882489 | 8  | 33.90% |
| Q9D172 | D10Jhu81e | 5   | 0.00040 | 0  | 0.00000 | 0.00 | 28090  | 9     | 0.07026314 | 3  | 19.90% |
| Q99LC5 | Etfb      | 3   | 0.00024 | 0  | 0.00000 | 0.00 | 35009  | 8.62  | 0.11264266 | 3  | 13.80% |
| P70429 | Evl       | 21  | 0.00167 | 4  | 0.00042 | 5.25 | 44337  | 8.92  | -0.1295169 | 9  | 33.10% |
| Q8BHZ0 | Fam49a    | 9   | 0.00072 | 3  | 0.00031 | 3.00 | 37343  | 5.71  | -0.0377709 | 1  | 4.00%  |
| Q921M7 | Fam49b    | 16  | 0.00127 | 7  | 0.00073 | 2.29 | 36776  | 5.76  | -0.0379938 | 7  | 25.30% |
| P08101 | Fcgr2     | 6   | 0.00048 | 2  | 0.00021 | 3.00 | 36695  | 6.24  | 0.01957575 | 5  | 21.20% |
| P39749 | Fen1      | 5   | 0.00040 | 0  | 0.00000 | 0.00 | 42315  | 8.54  | -0.1021429 | 3  | 7.10%  |
| P14234 | Fgr       | 2   | 0.00016 | 0  | 0.00000 | 0.00 | 58867  | 5.23  | -0.0063443 | 2  | 3.70%  |
| Q9R1C7 | Prpf40a   | 5   | 0.00040 | 0  | 0.00000 | 0.00 | 108481 | 7.39  | -0.2452149 | 3  | 2.10%  |
| P97807 | Fh        | 4   | 0.00032 | 0  | 0.00000 | 0.00 | 54357  | 9.12  | 0.07623274 | 2  | 5.10%  |
| Q00612 | G6pdx     | 3   | 0.00024 | 0  | 0.00000 | 0.00 | 59263  | 6.06  | -0.0322136 | 3  | 9.70%  |
| Q8BHN3 | Ganab     | 2   | 0.00016 | 0  | 0.00000 | 0.00 | 106911 | 5.67  | 0.02565678 | 2  | 3.50%  |
| P29387 | Gnb4      | 5   | 0.00040 | 0  | 0.00000 | 0.00 | 37379  | 5.74  | 0.01873527 | 1  | 3.20%  |
| P08752 | Gnai2     | 21  | 0.00167 | 9  | 0.00093 | 2.33 | 40489  | 5.28  | -0.0483098 | 6  | 21.10% |
| Q8BWF2 | Gimap5    | 2   | 0.00016 | 0  | 0.00000 | 0.00 | 34653  | 6.76  | -0.0454545 | 1  | 4.50%  |
| Q9JLQ2 | Git2      | 2   | 0.00016 | 0  | 0.00000 | 0.00 | 78766  | 7.64  | -0.1588699 | 2  | 4.70%  |
| P56400 | Gp1bb     | 4   | 0.00032 | 0  | 0.00000 | 0.00 | 21763  | 10.51 | 0.12067965 | 1  | 8.30%  |
| Q60631 | Grb2      | 2   | 0.00016 | 0  | 0.00000 | 0.00 | 25238  | 5.89  | -0.0795392 | 1  | 6.50%  |
| Q9JLM9 | Grb14     | 2   | 0.00016 | 0  | 0.00000 | 0.00 | 60573  | 8.69  | -0.0557807 | 1  | 3.00%  |
| P19157 | Gstp1     | 3   | 0.00024 | 0  | 0.00000 | 0.00 | 23609  | 7.69  | 0.03733334 | 2  | 17.10% |
| P17809 | Slc2a1    | 2   | 0.00016 | 0  | 0.00000 | 0.00 | 53985  | 9.05  | 0.2637604  | 1  | 2.00%  |
| Q61133 | Gstt2     | 4   | 0.00032 | 0  | 0.00000 | 0.00 | 27634  | 7.02  | 0.07372955 | 2  | 8.60%  |
| P01900 | H2-D1     | 2   | 0.00016 | 0  | 0.00000 | 0.00 | 33850  | 6.38  | -0.0905034 | 4  | 15.10% |
| P14429 | H2-Q7     | 7   | 0.00056 | 2  | 0.00021 | 3.50 | 37924  | 5.88  | 0.0042515  | 1  | 3.90%  |
| P14434 | H2-Aa     | 21  | 0.00167 | 10 | 0.00104 | 2.10 | 28093  | 4.64  | 0.1681641  | 3  | 19.90% |
| P04230 | H2-Eb1    | 3   | 0.00024 | 0  | 0.00000 | 0.00 | 30166  | 5.91  | 0.02738636 | 2  | 9.10%  |
| P08103 | Hck       | 5   | 0.00040 | 2  | 0.00021 | 2.50 | 59129  | 6.82  | -0.0417939 | 3  | 7.10%  |
| P36552 | Cpox      | 7   | 0.00056 | 3  | 0.00031 | 2.33 | 49715  | 8.81  | -0.0752596 | 3  | 9.90%  |
| P20060 | Hexb      | 2   | 0.00016 | 0  | 0.00000 | 0.00 | 61116  | 8.28  | 0.04507461 | 2  | 6.70%  |
| O54879 | Hmgb3     | 3   | 0.00024 | 0  | 0.00000 | 0.00 | 23010  | 8.48  | -0.3380002 | 2  | 16.00% |

|        |         |    |         |    |         |        |        |       |            |    |        |
|--------|---------|----|---------|----|---------|--------|--------|-------|------------|----|--------|
| P14901 | Hmox1   | 3  | 0.00024 | 0  | 0.00000 | 0.00   | 32929  | 6.08  | -0.010346  | 2  | 12.10% |
| Q9JIY5 | Htra2   | 2  | 0.00016 | 0  | 0.00000 | 0.00   | 49348  | 9.6   | 0.06006546 | 1  | 2.60%  |
| P49710 | Hcls1   | 19 | 0.00151 | 5  | 0.00052 | 3.80   | 54240  | 4.75  | -0.1827157 | 9  | 30.00% |
| P16627 | Hspa1l  | 5  | 0.00040 | 2  | 0.00021 | 2.50   | 70637  | 5.91  | -0.0433697 | 3  | 6.90%  |
| P13597 | Icam1   | 2  | 0.00016 | 0  | 0.00000 | 0.00   | 58844  | 5.79  | 0.04495343 | 2  | 3.70%  |
| O89110 | Casp8   | 2  | 0.00016 | 0  | 0.00000 | 0.00   | 55357  | 5.12  | -0.1167917 | 2  | 4.80%  |
| Q9QZD9 | Eif3i   | 7  | 0.00056 | 2  | 0.00021 | 3.50   | 36461  | 5.38  | 0.00759999 | 2  | 7.40%  |
| Q9Z1D1 | Eif3g   | 2  | 0.00016 | 0  | 0.00000 | 0.00   | 35638  | 5.7   | -0.1556563 | 2  | 14.70% |
| Q9DCH4 | Eif3f   | 4  | 0.00032 | 0  | 0.00000 | 0.00   | 37984  | 5.33  | 0.13775636 | 3  | 10.50% |
| Q9DBZ5 | Eif3k   | 2  | 0.00016 | 0  | 0.00000 | 0.00   | 25087  | 4.81  | 0.05155963 | 1  | 6.90%  |
| O55135 | Eif6    | 4  | 0.00032 | 0  | 0.00000 | 0.00   | 26511  | 4.63  | 0.0922041  | 2  | 17.10% |
| Q9Z1X4 | Ilf3    | 5  | 0.00040 | 0  | 0.00000 | 0.00   | 96021  | 8.86  | -0.0761471 | 3  | 5.20%  |
| Q9WTQ8 | Timm23  | 4  | 0.00032 | 0  | 0.00000 | 0.00   | 21978  | 9.24  | 0.15507175 | 1  | 4.80%  |
| Q8BKC5 | Ipo5    | 2  | 0.00016 | 0  | 0.00000 | 0.00   | 123591 | 4.82  | 0.06238837 | 1  | 1.00%  |
| Q9EPL8 | Ipo7    | 2  | 0.00016 | 0  | 0.00000 | 0.00   | 119486 | 4.7   | 0.03477842 | 2  | 2.00%  |
| P09055 | Irgb1   | 2  | 0.00016 | 0  | 0.00000 | 0.00   | 88231  | 5.68  | -0.0291353 | 2  | 4.60%  |
| P11835 | Irgb2   | 17 | 0.00135 | 4  | 0.00042 | 4.25   | 85026  | 7.02  | -0.0514656 | 9  | 14.80% |
| Q9D892 | Itpa    | 2  | 0.00016 | 0  | 0.00000 | 0.00   | 21897  | 5.6   | 0.04585858 | 1  | 7.10%  |
| Q9WTP6 | Ak2     | 3  | 0.00024 | 0  | 0.00000 | 0.00   | 26469  | 6.96  | -0.0324268 | 3  | 15.50% |
| P05132 | Prkaca  | 4  | 0.00032 | 0  | 0.00000 | 0.00   | 40571  | 8.84  | -0.0137892 | 2  | 7.70%  |
| P23475 | Xrcc6   | 4  | 0.00032 | 0  | 0.00000 | 0.00   | 69484  | 6.35  | -0.1093914 | 2  | 3.90%  |
| P62482 | Kcnab2  | 6  | 0.00048 | 0  | 0.00000 | 0.00   | 41021  | 9.11  | 0.01776566 | 3  | 15.00% |
| Q7TNC4 | Luc7l2  | 2  | 0.00016 | 0  | 0.00000 | 0.00   | 46583  | 10.11 | -0.5756882 | 5  | 15.30% |
| O89112 | Lancl1  | 2  | 0.00016 | 0  | 0.00000 | 0.00   | 45341  | 7.88  | 0.07476193 | 1  | 3.00%  |
| P21619 | Lmnb2   | 4  | 0.00032 | 0  | 0.00000 | 0.00   | 67318  | 5.4   | -0.2322986 | 13 | 30.70% |
| P32067 | Ssb     | 3  | 0.00024 | 0  | 0.00000 | 0.00   | 47756  | 9.77  | -0.2663131 | 2  | 7.70%  |
| O08573 | Lgals9  | 7  | 0.00056 | 0  | 0.00000 | 700.00 | 40036  | 9.41  | 0.05688379 | 2  | 7.60%  |
| Q60875 | Arhgef2 | 5  | 0.00040 | 2  | 0.00021 | 2.50   | 111974 | 6.89  | -0.152619  | 3  | 4.30%  |
| P19973 | Lsp1    | 20 | 0.00159 | 8  | 0.00083 | 2.50   | 36714  | 4.77  | -0.2511212 | 6  | 28.50% |
| P97823 | Lypla1  | 3  | 0.00024 | 0  | 0.00000 | 0.00   | 24688  | 6.14  | 0.16921735 | 2  | 17.40% |
| Q9WTL7 | Lypla2  | 6  | 0.00048 | 0  | 0.00000 | 0.00   | 24794  | 6.74  | 0.16476196 | 2  | 14.30% |
| P08905 | Lyz2    | 2  | 0.00016 | 0  | 0.00000 | 0.00   | 16689  | 9.11  | -0.0616892 | 3  | 14.20% |
| Q9JMH9 | Myo18a  | 30 | 0.00239 | 11 | 0.00114 | 2.73   | 232755 | 5.93  | -0.1894485 | 18 | 12.40% |
| P45700 | Man1a1  | 3  | 0.00024 | 0  | 0.00000 | 0.00   | 73276  | 6.34  | 0.04169461 | 2  | 4.30%  |
| Q9QXZ0 | Macf1   | 8  | 0.00064 | 3  | 0.00031 | 2.67   | 831878 | 5.3   | -0.1102176 | 8  | 1.60%  |
| P31230 | Aimp1   | 2  | 0.00016 | 0  | 0.00000 | 0.00   | 33997  | 8.57  | -0.0990968 | 2  | 11.00% |
| Q99MR8 | Mccc1   | 2  | 0.00016 | 0  | 0.00000 | 0.00   | 79344  | 7.69  | -0.007099  | 2  | 5.40%  |
| P97310 | Mcm2    | 2  | 0.00016 | 0  | 0.00000 | 0.00   | 102078 | 5.49  | -0.0985065 | 2  | 2.50%  |
| P25206 | Mcm3    | 4  | 0.00032 | 0  | 0.00000 | 0.00   | 91546  | 5.36  | -0.1228202 | 3  | 7.40%  |
| P49717 | Mcm4    | 2  | 0.00016 | 0  | 0.00000 | 0.00   | 96736  | 6.77  | -0.0678074 | 2  | 4.20%  |
| Q8VDP3 | Mical1  | 2  | 0.00016 | 0  | 0.00000 | 0.00   | 116785 | 5.73  | -0.034208  | 2  | 2.30%  |
| P47811 | Mapk14  | 2  | 0.00016 | 0  | 0.00000 | 0.00   | 41287  | 5.55  | 0.01211114 | 1  | 3.10%  |
| P05977 | Myl1    | 8  | 0.00064 | 3  | 0.00031 | 2.67   | 20595  | 4.98  | -0.0293617 | 1  | 8.50%  |
| Q3THE2 | Myl12b  | 9  | 0.00072 | 0  | 0.00000 | 900.00 | 19779  | 4.71  | -0.1352325 | 6  | 40.10% |
| Q8VEM8 | Slc25a3 | 12 | 0.00095 | 4  | 0.00042 | 3.00   | 39632  | 9.36  | 0.11817933 | 3  | 11.20% |
| Q9CQ65 | Mtap    | 2  | 0.00016 | 0  | 0.00000 | 0.00   | 31062  | 6.71  | 0.04416962 | 2  | 13.40% |
| P47802 | Mtx1    | 6  | 0.00048 | 0  | 0.00000 | 0.00   | 35624  | 5.82  | 0.03447953 | 3  | 11.40% |
| Q99104 | Myo5a   | 3  | 0.00024 | 0  | 0.00000 | 0.00   | 215538 | 8.82  | -0.1256506 | 3  | 1.80%  |
| Q9QY06 | Myo9b   | 3  | 0.00024 | 0  | 0.00000 | 0.00   | 238834 | 8.82  | -0.0971005 | 3  | 1.50%  |
| O08638 | Myh11   | 33 | 0.00263 | 12 | 0.00125 | 2.75   | 227028 | 5.37  | -0.2187219 | 8  | 4.10%  |
| Q9ERS2 | Ndufa13 | 5  | 0.00040 | 2  | 0.00021 | 2.50   | 16860  | 9.47  | -0.0372917 | 4  | 31.90% |
| P97369 | Ncf4    | 6  | 0.00048 | 0  | 0.00000 | 0.00   | 38707  | 5.95  | -0.0416519 | 5  | 26.30% |
| P15532 | Nme1    | 2  | 0.00016 | 0  | 0.00000 | 0.00   | 17208  | 6.84  | 0.01440789 | 2  | 19.10% |
| Q9CQ75 | Ndufa2  | 2  | 0.00016 | 0  | 0.00000 | 0.00   | 10916  | 10.02 | -0.0561616 | 1  | 14.10% |
| P57716 | Ncstn   | 2  | 0.00016 | 0  | 0.00000 | 0.00   | 78492  | 5.75  | 0.06091812 | 2  | 4.00%  |

|        |           |    |         |    |         |      |        |       |            |   |        |
|--------|-----------|----|---------|----|---------|------|--------|-------|------------|---|--------|
| Q99LY9 | Ndufs5    | 2  | 0.00016 | 0  | 0.00000 | 0.00 | 12648  | 9.1   | -0.2437736 | 1 | 11.30% |
| P32020 | Scp2      | 2  | 0.00016 | 0  | 0.00000 | 0.00 | 59126  | 7.16  | 0.05544789 | 2 | 3.80%  |
| O70378 | Cox4nb    | 2  | 0.00016 | 0  | 0.00000 | 0.00 | 12352  | 9.97  | -9.91E-04  | 1 | 16.20% |
| Q61937 | Npm1      | 19 | 0.00151 | 8  | 0.00083 | 2.38 | 32560  | 4.62  | -0.1967808 | 3 | 21.60% |
| O55126 | Gbas      | 2  | 0.00016 | 0  | 0.00000 | 0.00 | 32933  | 9.31  | -0.069146  | 2 | 11.40% |
| Q9CQE1 | Nipsnap3b | 4  | 0.00032 | 0  | 0.00000 | 0.00 | 28308  | 9.51  | 0.01072874 | 2 | 8.90%  |
| Q91YT0 | Ndufv1    | 5  | 0.00040 | 0  | 0.00000 | 0.00 | 50834  | 8.51  | 0.0169181  | 4 | 11.90% |
| Q91WD5 | Ndufs2    | 3  | 0.00024 | 0  | 0.00000 | 0.00 | 52626  | 6.52  | 0.01114471 | 2 | 5.00%  |
| Q99LC3 | Ndufa10   | 5  | 0.00040 | 0  | 0.00000 | 0.00 | 40603  | 7.63  | -0.0170141 | 4 | 15.80% |
| Q9DC69 | Ndufa9    | 7  | 0.00056 | 3  | 0.00031 | 2.33 | 42525  | 9.75  | 0.04912467 | 2 | 10.60% |
| Q9DCT2 | Ndufs3    | 8  | 0.00064 | 3  | 0.00031 | 2.67 | 30149  | 6.67  | -0.0426996 | 6 | 25.50% |
| Q8K2K6 | Agfg1     | 2  | 0.00016 | 0  | 0.00000 | 0.00 | 58043  | 8.82  | 0.05445633 | 2 | 9.10%  |
| Q8CHY6 | Gatad2a   | 3  | 0.00024 | 0  | 0.00000 | 0.00 | 67334  | 9.91  | -0.0737995 | 3 | 7.60%  |
| Q61205 | Pafah1b3  | 2  | 0.00016 | 0  | 0.00000 | 0.00 | 25853  | 6.42  | 0.02336205 | 1 | 3.90%  |
| Q9ERD8 | Parvg     | 3  | 0.00024 | 0  | 0.00000 | 0.00 | 37603  | 5.42  | 0.03223567 | 2 | 11.20% |
| Q9WU78 | Pdcd6ip   | 5  | 0.00040 | 0  | 0.00000 | 0.00 | 96024  | 6.15  | -0.0319563 | 4 | 5.40%  |
| Q8BG81 | Poldip3   | 3  | 0.00024 | 0  | 0.00000 | 0.00 | 46132  | 10.06 | -0.1094047 | 2 | 9.00%  |
| Q9EQ61 | Pes1      | 3  | 0.00024 | 0  | 0.00000 | 0.00 | 67796  | 6.41  | -0.1295548 | 2 | 4.50%  |
| P23506 | Pcmt1     | 2  | 0.00016 | 0  | 0.00000 | 0.00 | 24634  | 7.1   | 0.06612332 | 2 | 23.30% |
| Q9CWW6 | Pin4      | 3  | 0.00024 | 0  | 0.00000 | 0.00 | 13815  | 9.78  | -0.0570993 | 2 | 33.60% |
| Q60931 | Vdac3     | 6  | 0.00048 | 0  | 0.00000 | 0.00 | 30753  | 8.96  | 0.04459363 | 3 | 15.50% |
| P53810 | Pitpna    | 3  | 0.00024 | 0  | 0.00000 | 0.00 | 31893  | 5.97  | -0.1076384 | 1 | 8.50%  |
| P17742 | Ppia      | 19 | 0.00151 | 6  | 0.00062 | 3.17 | 17971  | 7.73  | 0.0196951  | 5 | 35.40% |
| Q91YR7 | Prpf6     | 5  | 0.00040 | 2  | 0.00021 | 2.50 | 106722 | 8.31  | -0.1272472 | 3 | 4.10%  |
| P46471 | Psmc2     | 5  | 0.00040 | 0  | 0.00000 | 0.00 | 48648  | 5.72  | -0.0761201 | 4 | 12.70% |
| P49722 | Psma2     | 3  | 0.00024 | 0  | 0.00000 | 0.00 | 25927  | 6.91  | 0.05487181 | 2 | 9.40%  |
| Q9R1P3 | Psemb2    | 2  | 0.00016 | 0  | 0.00000 | 0.00 | 22906  | 6.52  | 0.0160199  | 2 | 13.90% |
| Q9R1P1 | Psemb3    | 2  | 0.00016 | 0  | 0.00000 | 0.00 | 22965  | 6.15  | 0.08507316 | 2 | 14.60% |
| P26516 | Psmd7     | 9  | 0.00072 | 0  | 0.00000 | 0.00 | 36540  | 6.29  | -0.0732087 | 5 | 24.00% |
| Q9D8W5 | Psmd12    | 3  | 0.00024 | 0  | 0.00000 | 0.00 | 52895  | 6.66  | -0.089342  | 2 | 5.50%  |
| Q64697 | Ptprcap   | 5  | 0.00040 | 2  | 0.00021 | 2.50 | 20371  | 4.43  | 0.10431473 | 2 | 17.80% |
| Q8R2Y8 | Ptrh2     | 3  | 0.00024 | 0  | 0.00000 | 0.00 | 19527  | 6.95  | 0.07696129 | 1 | 7.70%  |
| Q64455 | Ptprij    | 6  | 0.00048 | 0  | 0.00000 | 0.00 | 136769 | 5.37  | 0.03694669 | 4 | 4.10%  |
| Q64737 | Gart      | 2  | 0.00016 | 0  | 0.00000 | 0.00 | 107503 | 6.25  | 0.0987825  | 1 | 1.10%  |
| P26043 | Rdx       | 10 | 0.00080 | 3  | 0.00031 | 3.33 | 68543  | 5.91  | -0.2407373 | 6 | 13.40% |
| P62827 | Ran       | 9  | 0.00072 | 4  | 0.00042 | 2.25 | 24423  | 7.01  | 0.02361109 | 2 | 6.90%  |
| Q8K386 | Rab15     | 2  | 0.00016 | 0  | 0.00000 | 0.00 | 24318  | 5.5   | -0.0982547 | 1 | 5.20%  |
| P35293 | Rab18     | 3  | 0.00024 | 0  | 0.00000 | 0.00 | 23035  | 5.24  | -0.0341748 | 2 | 12.60% |
| P35282 | Rab21     | 7  | 0.00056 | 3  | 0.00031 | 2.33 | 24106  | 8.11  | -0.0279279 | 4 | 22.10% |
| P35279 | Rab6a     | 3  | 0.00024 | 0  | 0.00000 | 0.00 | 23590  | 5.42  | -0.0762019 | 3 | 21.60% |
| Q9R0M6 | Rab9a     | 2  | 0.00016 | 0  | 0.00000 | 0.00 | 22910  | 5.44  | -0.0603483 | 1 | 5.50%  |
| P15307 | Rel       | 2  | 0.00016 | 0  | 0.00000 | 0.00 | 64960  | 6.1   | -0.044276  | 1 | 4.90%  |
| Q9WUK4 | Rfc2      | 7  | 0.00056 | 0  | 0.00000 | 0.00 | 38725  | 6.04  | 0.03406876 | 4 | 14.60% |
| P46061 | Rangap1   | 4  | 0.00032 | 0  | 0.00000 | 0.00 | 63531  | 4.59  | 0.02483871 | 3 | 9.20%  |
| Q9CPR4 | Rpl17     | 9  | 0.00072 | 4  | 0.00042 | 2.25 | 21423  | 10.2  | -0.2566848 | 6 | 26.10% |
| P67984 | Rpl22     | 9  | 0.00072 | 3  | 0.00031 | 3.00 | 14759  | 9.21  | -0.1804687 | 2 | 21.90% |
| P47962 | Rpl5      | 7  | 0.00056 | 0  | 0.00000 | 0.00 | 34401  | 9.78  | -0.1918182 | 3 | 12.80% |
| P12970 | Rpl7a     | 7  | 0.00056 | 2  | 0.00021 | 3.50 | 29977  | 10.56 | -0.1664285 | 2 | 10.20% |
| P14148 | Rpl7      | 10 | 0.00080 | 3  | 0.00031 | 3.33 | 31420  | 10.89 | -0.1862221 | 5 | 20.70% |
| P49312 | Hnrnpa1   | 9  | 0.00072 | 3  | 0.00031 | 3.00 | 34196  | 9.27  | -0.1165314 | 4 | 13.40% |
| O88569 | Hnrnpa2b1 | 29 | 0.00231 | 12 | 0.00125 | 2.42 | 37403  | 8.97  | -0.0845327 | 8 | 35.70% |
| Q8BG05 | Hnrnpa3   | 14 | 0.00111 | 5  | 0.00052 | 2.80 | 39652  | 9.1   | -0.1065701 | 4 | 12.90% |
| P70336 | Rock2     | 10 | 0.00080 | 2  | 0.00021 | 5.00 | 160586 | 5.73  | -0.1973563 | 5 | 5.70%  |
| Q9CRA8 | Exosc5    | 2  | 0.00016 | 0  | 0.00000 | 0.00 | 25194  | 7.52  | 0.02668085 | 2 | 9.80%  |
| P62071 | Rab21     | 7  | 0.00056 | 3  | 0.00031 | 2.33 | 24106  | 8.11  | -0.0279279 | 4 | 22.10% |

|        |          |    |         |    |         |        |        |       |            |   |        |
|--------|----------|----|---------|----|---------|--------|--------|-------|------------|---|--------|
| P63323 | Rps12    | 3  | 0.00024 | 0  | 0.00000 | 0.00   | 14525  | 6.82  | -0.0247727 | 1 | 7.60%  |
| Q9CZX8 | Rps19    | 9  | 0.00072 | 3  | 0.00031 | 3.00   | 16085  | 10.41 | -0.1603448 | 5 | 35.20% |
| Q9CQR2 | Rps21    | 3  | 0.00024 | 0  | 0.00000 | 0.00   | 9141   | 8.71  | -0.0810843 | 2 | 28.90% |
| P25444 | Rps2     | 6  | 0.00048 | 0  | 0.00000 | 0.00   | 31231  | 10.25 | 0.00477815 | 3 | 11.60% |
| P97351 | Rps3a    | 5  | 0.00040 | 0  | 0.00000 | 0.00   | 29885  | 9.75  | -0.1451516 | 3 | 17.00% |
| P14206 | Rpsa     | 22 | 0.00175 | 9  | 0.00093 | 2.44   | 32838  | 4.8   | 0.04132203 | 7 | 29.50% |
| Q9ER88 | Dap3     | 2  | 0.00016 | 0  | 0.00000 | 0.00   | 44699  | 9.1   | -0.0461637 | 1 | 3.10%  |
| Q62189 | Snrpa    | 15 | 0.00119 | 7  | 0.00073 | 2.14   | 31835  | 9.81  | 0.01533101 | 5 | 25.40% |
| Q62241 | Snrpc    | 2  | 0.00016 | 0  | 0.00000 | 0.00   | 17364  | 9.72  | -0.00239   | 2 | 13.20% |
| P70122 | Sbds     | 3  | 0.00024 | 0  | 0.00000 | 0.00   | 28781  | 8.92  | -0.1389601 | 1 | 8.80%  |
| Q9ERN0 | Scamp2   | 2  | 0.00016 | 0  | 0.00000 | 0.00   | 36465  | 5.94  | 0.17699091 | 2 | 9.70%  |
| Q8C1B7 | Sep-11   | 10 | 0.00080 | 4  | 0.00042 | 2.50   | 49695  | 6.24  | -0.1391415 | 5 | 13.50% |
| Q9BCZ4 | Vimp     | 2  | 0.00016 | 0  | 0.00000 | 0.00   | 21359  | 9.44  | -0.2109524 | 1 | 11.10% |
| P42209 | Sep-1    | 11 | 0.00088 | 4  | 0.00042 | 2.75   | 42020  | 5.59  | -0.1382787 | 7 | 22.40% |
| O55131 | Sep-7    | 10 | 0.00080 | 3  | 0.00031 | 3.33   | 50550  | 8.73  | -0.1795413 | 4 | 15.80% |
| Q8BRF7 | Scfd1    | 3  | 0.00024 | 0  | 0.00000 | 0.00   | 72323  | 5.98  | -0.0172614 | 3 | 7.00%  |
| Q8VE97 | Sfrs4    | 5  | 0.00040 | 2  | 0.00021 | 2.50   | 55979  | 11.39 | -0.649508  | 1 | 2.70%  |
| O35326 | Sfrs5    | 3  | 0.00024 | 0  | 0.00000 | 0.00   | 30891  | 11.56 | -0.5140517 | 2 | 8.90%  |
| Q8CG47 | Smc4     | 3  | 0.00024 | 0  | 0.00000 | 0.00   | 146895 | 6.91  | -0.1478307 | 2 | 2.00%  |
| O09044 | Snap23   | 13 | 0.00103 | 5  | 0.00052 | 2.60   | 23261  | 4.88  | -0.187     | 4 | 35.70% |
| P09671 | Sod2     | 7  | 0.00056 | 2  | 0.00021 | 3.50   | 24603  | 8.8   | 0.02554055 | 4 | 26.60% |
| Q9QX47 | Son      | 8  | 0.00064 | 3  | 0.00031 | 2.67   | 265651 | 5.46  | -0.0865426 | 5 | 3.20%  |
| O55128 | Sap18    | 2  | 0.00016 | 0  | 0.00000 | 0.00   | 17595  | 9.38  | -0.1649673 | 1 | 10.50% |
| O89090 | Sp1      | 2  | 0.00016 | 0  | 0.00000 | 0.00   | 80732  | 6.94  | 0.01920915 | 1 | 3.60%  |
| P46062 | Sipa1    | 10 | 0.00080 | 4  | 0.00042 | 2.50   | 112066 | 5.94  | -0.0376664 | 7 | 10.90% |
| P49962 | Srp9     | 2  | 0.00016 | 0  | 0.00000 | 0.00   | 10194  | 7.78  | -0.1204651 | 1 | 12.80% |
| Q60770 | Stxbp3   | 4  | 0.00032 | 0  | 0.00000 | 0.00   | 67942  | 8.28  | -0.0843074 | 3 | 5.20%  |
| O55098 | Stk10    | 15 | 0.00119 | 6  | 0.00062 | 2.50   | 111906 | 6.71  | -0.2537063 | 5 | 6.30%  |
| P54116 | Stom     | 2  | 0.00016 | 0  | 0.00000 | 0.00   | 31375  | 6.46  | 0.0657042  | 2 | 10.90% |
| Q9EPQ7 | Stard5   | 2  | 0.00016 | 0  | 0.00000 | 0.00   | 23922  | 5.97  | -0.0206573 | 1 | 5.20%  |
| Q93092 | Taldo1   | 4  | 0.00032 | 0  | 0.00000 | 0.00   | 37387  | 6.57  | -0.0067656 | 3 | 10.10% |
| P36371 | Tap2     | 6  | 0.00048 | 0  | 0.00000 | 0.00   | 77445  | 6.82  | 0.12984376 | 5 | 9.80%  |
| Q61390 | Cct6b    | 5  | 0.00040 | 2  | 0.00021 | 2.50   | 58185  | 6.96  | 0.04625235 | 1 | 4.00%  |
| Q62393 | Tpd52    | 5  | 0.00040 | 0  | 0.00000 | 0.00   | 24313  | 4.69  | -0.0802232 | 3 | 24.60% |
| Q9CQR4 | Acot13   | 3  | 0.00024 | 0  | 0.00000 | 0.00   | 15183  | 8.95  | 0.0792857  | 2 | 15.00% |
| P62915 | Gtf2b    | 2  | 0.00016 | 0  | 0.00000 | 0.00   | 34819  | 8.67  | -0.0548418 | 1 | 4.40%  |
| P40630 | Tfam     | 21 | 0.00167 | 10 | 0.00104 | 2.10   | 27988  | 9.71  | -0.1893005 | 8 | 33.30% |
| P70318 | Tial1    | 2  | 0.00016 | 0  | 0.00000 | 0.00   | 43389  | 8.11  | 0.01112243 | 1 | 5.90%  |
| Q8C0G2 | Traf3ip3 | 2  | 0.00016 | 0  | 0.00000 | 0.00   | 58564  | 8.46  | -0.2357895 | 2 | 6.20%  |
| P21107 | Tpm3     | 2  | 0.00016 | 0  | 0.00000 | 0.00   | 32994  | 4.68  | -0.291579  | 1 | 3.90%  |
| P35441 | Thbs1    | 7  | 0.00056 | 0  | 0.00000 | 700.00 | 129647 | 4.72  | -0.1092392 | 4 | 4.00%  |
| Q9WUP7 | Uchl5    | 5  | 0.00040 | 2  | 0.00021 | 2.50   | 37617  | 5.24  | -0.0364134 | 5 | 22.20% |
| Q9CR68 | Uqcrfs1  | 6  | 0.00048 | 0  | 0.00000 | 0.00   | 29368  | 8.92  | 0.03974452 | 4 | 24.50% |
| P50516 | Atp6v1a  | 10 | 0.00080 | 3  | 0.00031 | 3.33   | 68326  | 5.42  | 0.03726094 | 9 | 22.90% |
| Q9WV55 | Vapa     | 9  | 0.00072 | 4  | 0.00042 | 2.25   | 27855  | 8.58  | -0.0543775 | 3 | 18.90% |
| Q9QY76 | Vapb     | 2  | 0.00016 | 0  | 0.00000 | 0.00   | 26946  | 7.64  | -0.0505762 | 2 | 10.70% |
| P50518 | Atp6v1e1 | 2  | 0.00016 | 0  | 0.00000 | 0.00   | 26157  | 8.44  | -0.1374337 | 2 | 11.90% |
| Q9DBH5 | Lman2    | 5  | 0.00040 | 0  | 0.00000 | 0.00   | 40430  | 6.46  | 0.01159217 | 3 | 12.60% |
| Q91VU6 | Dcaf11   | 2  | 0.00016 | 0  | 0.00000 | 0.00   | 61992  | 6     | -0.1051002 | 1 | 3.30%  |
| Q6ZQL4 | Wdr43    | 2  | 0.00016 | 0  | 0.00000 | 0.00   | 75381  | 5.23  | -0.0694092 | 1 | 4.10%  |
| O88342 | Wdr1     | 11 | 0.00088 | 2  | 0.00021 | 5.50   | 66407  | 6.11  | 0.05250826 | 6 | 18.00% |
| P83741 | Wnk1     | 2  | 0.00016 | 0  | 0.00000 | 0.00   | 250934 | 6     | -0.000829  | 1 | 0.50%  |
| Q9CYH2 | Fam213a  | 2  | 0.00016 | 0  | 0.00000 | 0.00   | 24395  | 9.22  | 0.03899083 | 2 | 11.90% |
| Q99JY4 | Trabd    | 2  | 0.00016 | 0  | 0.00000 | 0.00   | 42189  | 8.65  | -0.0244947 | 1 | 3.20%  |
| Q9QY24 | Zbp1     | 2  | 0.00016 | 0  | 0.00000 | 0.00   | 44331  | 5.47  | -0.0361314 | 1 | 3.20%  |

|        |             |    |         |    |         |      |        |       |            |      |        |
|--------|-------------|----|---------|----|---------|------|--------|-------|------------|------|--------|
| O08692 | Ngp         | 2  | 0.00016 | 0  | 0.00000 | 0.00 | 19332  | 5.21  | -0.1941917 | 1    | 12.60% |
| Q9QUG9 | Rasgrp2     | 2  | 0.00016 | 0  | 0.00000 | 0.00 | 69446  | 7.6   | -0.044227  | 1    | 3.10%  |
| O35405 | Pld3        | 2  | 0.00016 | 0  | 0.00000 | 0.00 | 54389  | 6.07  | 0.07581967 | 2    | 4.50%  |
| A1L333 | Ddx5        | 5  | 0.00040 | 2  | 0.00021 | 2.50 | 69290  | 9.06  | -0.1188434 | 10   | 27.40% |
| Q794H2 | Nap1I3      | 2  | 0.00016 | 0  | 0.00000 | 0.00 | 61377  | 4.74  | -0.192463  | 1    | 2.60%  |
| O70145 | Ncf2        | 4  | 0.00032 | 0  | 0.00000 | 0.00 | 59485  | 6.18  | -0.0282857 | 2    | 7.40%  |
| Q8CDN6 | Txn1        | 2  | 0.00016 | 0  | 0.00000 | 0.00 | 32237  | 4.84  | -0.0224568 | 1    | 5.20%  |
| Q52K18 | Srrm1       | 3  | 0.00024 | 0  | 0.00000 | 0.00 | 106862 | 11.87 | -0.5358872 | 3    | 4.40%  |
| P62264 | Rps14       | 9  | 0.00072 | 2  | 0.00021 | 4.50 | 16273  | 10.07 | -0.1370199 | 2    | 10.60% |
| Q9QWR8 | Naga        | 5  | 0.00040 | 2  | 0.00021 | 2.50 | 47235  | 6.02  | 0.07489154 | 3    | 9.90%  |
| P70388 | Rad50       | 2  | 0.00016 | 0  | 0.00000 | 0.00 | 153488 | 6.53  | -0.2609597 | 2    | 1.80%  |
| P70670 | Naca        | 4  | 0.00032 | 0  | 0.00000 | 0.00 | 220499 | 9.39  | 0.03425754 | 2    | 1.40%  |
| Q31150 | H2-Oa       | 4  | 0.00032 | 0  | 0.00000 | 0.00 | 28167  | 6.44  | 0.11312003 | 2    | 12.80% |
| Q31188 | MHC integra | 2  | 0.00016 | 0  | 0.00000 | 0.00 | 46976  | 8.65  | -0.0017577 | 2    | 15.20% |
| Q60749 | Khdrbs1     | 3  | 0.00024 | 0  | 0.00000 | 0.00 | 48371  | 8.81  | -0.1111513 | 1    | 3.20%  |
| Q60766 | Irgm        | 8  | 0.00064 | 2  | 0.00021 | 4.00 | 72585  | 7.06  | 0.01418673 | 6    | 19.70% |
| Q61107 | Gbp4        | 5  | 0.00040 | 0  | 0.00000 | 0.00 | 70801  | 6.23  | -0.0638387 | 2    | 4.20%  |
| O35129 | Phb2        | 14 | 0.00111 | 6  | 0.00062 | 2.33 | 33296  | 9.83  | -0.0453846 | 8    | 29.80% |
| Q3U0K0 | Ifi47       | 5  | 0.00040 | 2  | 0.00021 | 2.50 | 46785  | 6.28  | 0.08076191 | 4    | 13.10% |
| Q61735 | Cd47        | 9  | 0.00072 | 4  | 0.00042 | 2.25 | 33098  | 8.93  | 0.27831697 | 2    | 8.90%  |
| Q3TTY5 | Krt2        | 3  | 0.00024 | 0  | 0.00000 | 0.00 | 70923  | 8.26  | -0.0205376 | 3    | 3.70%  |
| Q61769 | Mki67       | 3  | 0.00024 | 0  | 0.00000 | 0.00 | 350864 | 9.73  | -0.2536632 | 2    | 2.00%  |
| Q64735 | Crry        | 2  | 0.00016 | 0  | 0.00000 | 0.00 | 36544  | 4.89  | -0.0244947 | 1    | 3.20%  |
| P14131 | Rps16       | 5  | 0.00040 | 2  | 0.00021 | 2.50 | 16445  | 10.21 | -0.1269178 | 4    | 29.50% |
| P63242 | Eif5a       | 3  | 0.00024 | 0  | 0.00000 | 0.00 | 16832  | 5.07  | 0.01058442 | 2    | 8.40%  |
| Q61FZ6 | Krt77       | 4  | 0.00032 | 0  | 0.00000 | 0.00 | 61359  | 7.74  | -0.0684965 | 1    | 2.10%  |
| Q68FL4 | Ahcyl2      | 3  | 0.00024 | 0  | 0.00000 | 0.00 | 66899  | 7.13  | -0.0092659 | 2    | 5.90%  |
| Q3U2N8 | Wdfy4       | 2  | 0.00016 | 0  | 0.00000 | 0.00 | 337363 | 5.94  | 0.07107451 | 2    | 0.80%  |
| Q8BLF1 | Nceh1       | 2  | 0.00016 | 0  | 0.00000 | 0.00 | 45740  | 6.56  | 0.09843139 | 1    | 2.90%  |
| Q92511 | Atad3       | 10 | 0.00080 | 3  | 0.00031 | 3.33 | 66742  | 9.32  | -0.1640267 | 7    | 14.20% |
| Q69ZN7 | Myof        | 5  | 0.00040 | 0  | 0.00000 | 0.00 | 233324 | 5.83  | -0.0386718 | 5    | 3.30%  |
| Q8C7E9 | Cstf2t      | 2  | 0.00016 | 0  | 0.00000 | 0.00 | 65862  | 6.78  | 0.00522151 | 2    | 8.20%  |
| Q3TBU0 | Unc84b      | 2  | 0.00016 | 0  | 0.00000 | 0.00 | #N/A   | #N/A  | #N/A       | #N/A | #N/A   |
| Q3UVT5 | Pi4ka       | 8  | 0.00064 | 0  | 0.00000 | 0.00 | 231355 | 6.44  | 0.04967243 | 6    | 3.70%  |
| Q8BH95 | Echs1       | 3  | 0.00024 | 0  | 0.00000 | 0.00 | 31474  | 8.76  | 0.03020692 | 2    | 8.60%  |
| Q3UFZ6 | Caprin1     | 2  | 0.00016 | 0  | 0.00000 | 0.00 | 78169  | 5.14  | -0.1408908 | 4    | 7.50%  |
| Q4VBF6 | Bcl2        | 2  | 0.00016 | 0  | 0.00000 | 0.00 | 26407  | 6.65  | 0.07419491 | 1    | 11.40% |
| Q6NV83 | U2surp      | 2  | 0.00016 | 0  | 0.00000 | 0.00 | 118261 | 8.6   | -0.2900579 | 1    | 1.20%  |
| Q6NZB0 | Dnajc8      | 6  | 0.00048 | 2  | 0.00021 | 3.00 | 29813  | 9.04  | -0.3714228 | 5    | 20.20% |
| Q6NZJ6 | Eif4g1      | 2  | 0.00016 | 0  | 0.00000 | 0.00 | 176077 | 5.3   | -0.0947565 | 5    | 5.60%  |
| Q6P4S8 | Ints1       | 2  | 0.00016 | 0  | 0.00000 | 0.00 | 245168 | 5.87  | 0.0109385  | 2    | 1.30%  |
| Q6P5E6 | Gga2        | 2  | 0.00016 | 0  | 0.00000 | 0.00 | 66049  | 6.88  | 0.03771146 | 1    | 3.00%  |
| Q5H8C4 | Vps13a      | 2  | 0.00016 | 0  | 0.00000 | 0.00 | 359401 | 5.83  | 0.03904932 | 1    | 0.50%  |
| Q640N3 | Arhgap30    | 2  | 0.00016 | 0  | 0.00000 | 0.00 | 120114 | 4.79  | -0.1090643 | 5    | 5.40%  |
| Q6P9J9 | Ano6        | 2  | 0.00016 | 0  | 0.00000 | 0.00 | 106255 | 6.34  | 0.07382003 | 2    | 3.50%  |
| Q3UFI7 | Nup205      | 3  | 0.00024 | 0  | 0.00000 | 0.00 | 227465 | 5.92  | 0.03162362 | 3    | 2.80%  |
| Q6P9R2 | Oxsr1       | 3  | 0.00024 | 0  | 0.00000 | 0.00 | 58214  | 6.03  | -0.0260531 | 2    | 4.70%  |
| A2AN08 | Ubr4        | 3  | 0.00024 | 0  | 0.00000 | 0.00 | 572290 | 5.72  | 0.02410425 | 2    | 0.50%  |
| Q6PE01 | Snrnp40     | 11 | 0.00088 | 3  | 0.00031 | 3.67 | 39276  | 8.34  | 0.00234636 | 5    | 30.70% |
| O08585 | CIta        | 2  | 0.00016 | 0  | 0.00000 | 0.00 | 25604  | 4.5   | -0.0944255 | 1    | 8.90%  |
| Q6ZQ38 | Cand1       | 4  | 0.00032 | 0  | 0.00000 | 0.00 | 136332 | 5.52  | 0.04928459 | 3    | 3.10%  |
| Q3UHQ5 | Gcn1I1      | 3  | 0.00024 | 0  | 0.00000 | 0.00 | 293021 | 7.14  | 0.06586672 | 5    | 2.20%  |
| Q9QXS1 | Plec        | 40 | 0.00318 | 16 | 0.00166 | 2.50 | 534216 | 5.74  | -0.183927  | 35   | 9.70%  |
| Q78HU7 | Gypc        | 3  | 0.00024 | 0  | 0.00000 | 0.00 | 10329  | 5.21  | 0.15463157 | 1    | 28.40% |
| Q6ZPE2 | Sbf1        | 2  | 0.00016 | 0  | 0.00000 | 0.00 | 208693 | 6.71  | -0.0247723 | 1    | 0.90%  |

|        |            |    |         |    |         |      |        |       |            |    |        |
|--------|------------|----|---------|----|---------|------|--------|-------|------------|----|--------|
| Q6ZQ08 | Cnot1      | 3  | 0.00024 | 0  | 0.00000 | 0.00 | 266808 | 6.65  | 0.05032018 | 5  | 2.50%  |
| Q8BG67 | Efr3a      | 2  | 0.00016 | 0  | 0.00000 | 0.00 | 92613  | 6.36  | 0.00568988 | 1  | 1.70%  |
| P61327 | Magoh      | 2  | 0.00016 | 0  | 0.00000 | 0.00 | 17164  | 5.74  | -0.044726  | 2  | 26.00% |
| Q9CPV4 | Glod4      | 2  | 0.00016 | 0  | 0.00000 | 0.00 | 33317  | 5.28  | -0.0160738 | 1  | 6.00%  |
| Q7TN13 | Cad        | 2  | 0.00016 | 0  | 0.00000 | 0.00 | 243238 | 6     | 0.07306494 | 9  | 6.10%  |
| Q7TN29 | Smcp2      | 2  | 0.00016 | 0  | 0.00000 | 0.00 | 46578  | 9.01  | 0.00341121 | 2  | 9.60%  |
| Q7TNS7 | Asic4      | 2  | 0.00016 | 0  | 0.00000 | 0.00 | 59216  | 6.32  | 0.02146566 | 1  | 3.20%  |
| Q7TPH6 | Mycbp2     | 2  | 0.00016 | 0  | 0.00000 | 0.00 | 517738 | 6.75  | -0.0184949 | 1  | 0.30%  |
| P83917 | Cbx1       | 2  | 0.00016 | 0  | 0.00000 | 0.00 | 21418  | 4.85  | -0.2960541 | 1  | 9.20%  |
| Q7TSA3 | Btla       | 5  | 0.00040 | 2  | 0.00021 | 2.50 | 34337  | 7.11  | -0.0160784 | 1  | 3.90%  |
| Q5DTM8 | Rnf20      | 2  | 0.00016 | 0  | 0.00000 | 0.00 | 113520 | 5.74  | -0.31001   | 1  | 1.10%  |
| Q3TLH4 | Prrc2c     | 3  | 0.00024 | 0  | 0.00000 | 0.00 | 310892 | 9.14  | -0.196289  | 1  | 0.60%  |
| P26039 | Tln1       | 3  | 0.00024 | 0  | 0.00000 | 0.00 | 269821 | 5.84  | -0.0027587 | 55 | 34.00% |
| Q80TU6 | Acin1      | 2  | 0.00016 | 0  | 0.00000 | 0.00 | 150719 | 5.71  | -0.3573538 | 7  | 8.70%  |
| Q8BTI8 | Srrm2      | 5  | 0.00040 | 0  | 0.00000 | 0.00 | 294840 | 12.02 | -0.4453489 | 11 | 6.70%  |
| Q80V42 | Cpm        | 7  | 0.00056 | 0  | 0.00000 | 0.00 | 50556  | 7.66  | 0.04503384 | 4  | 12.00% |
| A2AR02 | Ppig       | 2  | 0.00016 | 0  | 0.00000 | 0.00 | 88325  | 10.27 | -0.6307033 | 1  | 2.40%  |
| Q80VD1 | Fam98b     | 3  | 0.00024 | 0  | 0.00000 | 0.00 | 45349  | 8.77  | -0.0531236 | 2  | 6.50%  |
| Q80WS3 | Fbl1       | 2  | 0.00016 | 0  | 0.00000 | 0.00 | 33339  | 10.16 | -0.0502548 | 1  | 3.50%  |
| Q8C2K1 | Def6       | 9  | 0.00072 | 4  | 0.00042 | 2.25 | 73454  | 5.94  | -0.2358888 | 4  | 7.80%  |
| P62702 | Rps4x      | 5  | 0.00040 | 2  | 0.00021 | 2.50 | 29598  | 10.16 | -0.0631179 | 3  | 7.20%  |
| Q5SUA5 | Myo1g      | 21 | 0.00167 | 10 | 0.00104 | 2.10 | 117227 | 8.83  | -0.0725976 | 23 | 28.60% |
| Q3TIX9 | Usp39      | 2  | 0.00016 | 0  | 0.00000 | 0.00 | 65146  | 9.01  | -0.1102836 | 1  | 2.10%  |
| Q8BFZ9 | Erlin2     | 2  | 0.00016 | 0  | 0.00000 | 0.00 | 37873  | 5.37  | 0.05073532 | 2  | 7.10%  |
| Q9EQ32 | Pik3ap1    | 2  | 0.00016 | 0  | 0.00000 | 0.00 | 90928  | 5.06  | -0.0724784 | 1  | 1.50%  |
| Q8BPF4 | Hba-a1     | 5  | 0.00040 | 0  | 0.00000 | 0.00 | 15112  | 7.97  | 0.11295774 | 2  | 21.10% |
| Q8CCF0 | Prpf31     | 5  | 0.00040 | 0  | 0.00000 | 0.00 | 55430  | 5.55  | -0.0778156 | 3  | 12.60% |
| Q8BP67 | Rpl24      | 2  | 0.00016 | 0  | 0.00000 | 0.00 | 17779  | 11.26 | -0.3231211 | 1  | 7.60%  |
| P62754 | Rps6       | 3  | 0.00024 | 0  | 0.00000 | 0.00 | 28681  | 10.85 | -0.3571887 | 2  | 10.40% |
| P61979 | Hnrnpk     | 9  | 0.00072 | 4  | 0.00042 | 2.25 | 50976  | 5.39  | -0.0940389 | 5  | 9.70%  |
| P63276 | Rps17      | 6  | 0.00048 | 2  | 0.00021 | 3.00 | 15524  | 9.85  | -0.1668889 | 1  | 16.30% |
| Q66K09 | 5830443L24 | 2  | 0.00016 | 0  | 0.00000 | 0.00 | 14099  | 11.47 | -0.4452032 | 1  | 11.40% |
| Q8BTX9 | Hsd1       | 4  | 0.00032 | 0  | 0.00000 | 0.00 | 36868  | 8.73  | 0.12842429 | 3  | 18.20% |
| Q8BV28 | Coq10a     | 2  | 0.00016 | 0  | 0.00000 | 0.00 | 65146  | 9.01  | -0.1102836 | 1  | 2.10%  |
| Q9CQT1 | Mri1       | 2  | 0.00016 | 0  | 0.00000 | 0.00 | 39411  | 5.6   | 0.0785908  | 1  | 5.70%  |
| Q4V9U6 | Gimap9     | 4  | 0.00032 | 0  | 0.00000 | 0.00 | 15494  | 8.61  | -0.0010145 | 1  | 10.10% |
| Q5F2E8 | Taok1      | 2  | 0.00016 | 0  | 0.00000 | 0.00 | 116050 | 7.14  | -0.2106896 | 2  | 2.10%  |
| Q8BPB0 | Mob1b      | 2  | 0.00016 | 0  | 0.00000 | 0.00 | 25091  | 6.24  | 0.0275926  | 1  | 5.60%  |
| P62141 | Ppp1cb     | 3  | 0.00024 | 0  | 0.00000 | 0.00 | 37187  | 5.84  | 0.00198776 | 1  | 3.10%  |
| Q9CZX0 | Elp3       | 2  | 0.00016 | 0  | 0.00000 | 0.00 | 62385  | 9.05  | -0.0453017 | 1  | 2.90%  |
| Q8C2Q3 | Rbm14      | 3  | 0.00024 | 0  | 0.00000 | 0.00 | 69449  | 9.68  | -0.0026607 | 7  | 17.80% |
| Q922Q1 | MOSC2      | 2  | 0.00016 | 0  | 0.00000 | 0.00 | 38194  | 8.95  | -0.0318639 | 2  | 7.70%  |
| Q505D7 | Opa3       | 2  | 0.00016 | 0  | 0.00000 | 0.00 | 20110  | 8.62  | -0.0190503 | 1  | 6.70%  |
| Q8C7R4 | Uba6       | 2  | 0.00016 | 0  | 0.00000 | 0.00 | 117966 | 5.75  | 0.02835709 | 1  | 1.30%  |
| Q8VDL4 | Adpgk      | 2  | 0.00016 | 0  | 0.00000 | 0.00 | 53902  | 5.37  | 0.13447587 | 2  | 5.80%  |
| A2AF47 | Dock11     | 4  | 0.00032 | 0  | 0.00000 | 0.00 | 237771 | 7.94  | -0.0229715 | 2  | 0.90%  |
| Q9CXY6 | Ilf2       | 3  | 0.00024 | 0  | 0.00000 | 0.00 | 43062  | 5.19  | 0.02479488 | 3  | 12.60% |
| P70227 | Itpr3      | 2  | 0.00016 | 0  | 0.00000 | 0.00 | 304275 | 6.11  | -0.0050711 | 2  | 1.00%  |
| Q3U6Q5 | Lyn        | 2  | 0.00016 | 0  | 0.00000 | 0.00 | 58812  | 6.74  | -0.0661719 | 13 | 32.60% |
| P63280 | Ube2i      | 3  | 0.00024 | 0  | 0.00000 | 0.00 | 18007  | 8.87  | -0.0411393 | 2  | 16.50% |
| Q8C143 | Myl6b      | 12 | 0.00095 | 3  | 0.00031 | 4.00 | 22749  | 5.41  | -0.0634783 | 1  | 4.30%  |
| Q8BGU5 | Ccny       | 3  | 0.00024 | 0  | 0.00000 | 0.00 | 39395  | 6.76  | -0.1043695 | 2  | 9.40%  |
| Q9D2G2 | Dlst       | 6  | 0.00048 | 2  | 0.00021 | 3.00 | 48995  | 9.1   | 0.00944932 | 1  | 2.60%  |
| Q8JZQ2 | Afg3l2     | 2  | 0.00016 | 0  | 0.00000 | 0.00 | 89519  | 8.77  | -0.0341771 | 1  | 1.70%  |
| Q8K051 | Trip12     | 3  | 0.00024 | 0  | 0.00000 | 0.00 | 224128 | 8.64  | -0.0783655 | 2  | 1.30%  |

|        |          |    |         |   |         |        |        |       |            |   |        |
|--------|----------|----|---------|---|---------|--------|--------|-------|------------|---|--------|
| Q8K124 | Plekho2  | 3  | 0.00024 | 0 | 0.00000 | 0.00   | 53872  | 5.4   | -0.1549697 | 2 | 9.10%  |
| Q8K1M6 | Dnm1l    | 4  | 0.00032 | 0 | 0.00000 | 0.00   | 82658  | 6.61  | -0.0342049 | 4 | 7.70%  |
| Q8K4G5 | Ablim1   | 2  | 0.00016 | 0 | 0.00000 | 0.00   | 96805  | 8.93  | -0.1296166 | 2 | 4.40%  |
| Q8K2H4 | Acap1    | 9  | 0.00072 | 0 | 0.00000 | 900.00 | 81704  | 7.32  | -0.0522703 | 5 | 13.80% |
| Q8K2Q7 | Brox     | 2  | 0.00016 | 0 | 0.00000 | 0.00   | 46202  | 7.59  | -0.0133333 | 1 | 2.70%  |
| Q8R010 | Aimp2    | 2  | 0.00016 | 0 | 0.00000 | 0.00   | 35378  | 7.7   | 0.04068749 | 1 | 7.80%  |
| Q8R0B3 | Armcx5   | 2  | 0.00016 | 0 | 0.00000 | 0.00   | 46489  | 6.47  | 0.06974179 | 1 | 4.70%  |
| Q8R0F6 | Ilkap    | 2  | 0.00016 | 0 | 0.00000 | 0.00   | 42774  | 7.04  | -0.0830612 | 2 | 5.40%  |
| Q91ZJ5 | Ugp2     | 2  | 0.00016 | 0 | 0.00000 | 0.00   | 56979  | 7.18  | 0.00635827 | 2 | 4.50%  |
| Q8CHT0 | Aldh4a1  | 2  | 0.00016 | 0 | 0.00000 | 0.00   | 61841  | 8.45  | 0.04590746 | 2 | 4.60%  |
| Q569Z5 | Ddx46    | 5  | 0.00040 | 0 | 0.00000 | 0.00   | 117448 | 9.3   | -0.2657756 | 5 | 5.90%  |
| Q5ND34 | Wdr81    | 2  | 0.00016 | 0 | 0.00000 | 0.00   | 211945 | 5.5   | 0.02994831 | 1 | 0.60%  |
| Q5XJY5 | Arcn1    | 2  | 0.00016 | 0 | 0.00000 | 0.00   | 57229  | 5.89  | -0.0435813 | 2 | 8.20%  |
| Q9DBA8 | Amdhd1   | 2  | 0.00016 | 0 | 0.00000 | 0.00   | 46489  | 6.47  | 0.06974179 | 1 | 4.70%  |
| Q8R2K3 | Ssbp1    | 2  | 0.00016 | 0 | 0.00000 | 0.00   | 17157  | 9.78  | -0.1196622 | 1 | 12.20% |
| Q80UN3 | Nup153   | 2  | 0.00016 | 0 | 0.00000 | 0.00   | 152008 | 9.04  | -0.0073256 | 1 | 2.00%  |
| Q8BL97 | Sfrs7    | 5  | 0.00040 | 0 | 0.00000 | 0.00   | 30818  | 11.89 | -0.4581271 | 2 | 9.70%  |
| Q3TKT4 | Smarca4  | 7  | 0.00056 | 3 | 0.00031 | 2.33   | 181427 | 8     | -0.1596217 | 8 | 8.20%  |
| Q8VDW0 | Ddx39a   | 6  | 0.00048 | 0 | 0.00000 | 0.00   | 49067  | 5.46  | -0.0474473 | 9 | 22.20% |
| Q8VE10 | Naa40    | 2  | 0.00016 | 0 | 0.00000 | 0.00   | 27229  | 7.03  | -0.1224895 | 1 | 5.10%  |
| A2AW41 | Hnrnrp   | 10 | 0.00080 | 3 | 0.00031 | 3.33   | 30064  | 5.24  | -0.0460741 | 4 | 26.30% |
| Q80VQ0 | Aldh3b1  | 2  | 0.00016 | 0 | 0.00000 | 0.00   | 52292  | 7.5   | 0.02269231 | 1 | 3.00%  |
| Q1AFZ1 | EG667622 | 10 | 0.00080 | 3 | 0.00031 | 3.33   | 66742  | 9.32  | -0.1640267 | 7 | 14.20% |
| Q91V64 | Isoc1    | 3  | 0.00024 | 0 | 0.00000 | 0.00   | 32033  | 6.96  | 0.17993271 | 3 | 13.80% |
| Q91W98 | Slc15a4  | 2  | 0.00016 | 0 | 0.00000 | 0.00   | 62256  | 9.32  | 0.23015682 | 1 | 2.30%  |
| Q91WN4 | Kmo      | 2  | 0.00016 | 0 | 0.00000 | 0.00   | 54532  | 9.07  | 0.06830896 | 2 | 4.20%  |
| Q8BMF4 | Dlat     | 7  | 0.00056 | 3 | 0.00031 | 2.33   | 67942  | 8.81  | 0.08733644 | 4 | 11.20% |
| Q4VAA2 | Cdv3     | 2  | 0.00016 | 0 | 0.00000 | 0.00   | 29729  | 5.84  | -0.2417794 | 1 | 8.20%  |
| Q5SUF2 | Luc7l3   | 3  | 0.00024 | 0 | 0.00000 | 0.00   | 51450  | 9.79  | -0.6118047 | 2 | 7.40%  |
| Q91VR5 | Ddx1     | 3  | 0.00024 | 0 | 0.00000 | 0.00   | 82500  | 6.8   | -0.015446  | 2 | 4.10%  |
| Q922Q8 | Lrrc59   | 6  | 0.00048 | 2 | 0.00021 | 3.00   | 34877  | 9.57  | -0.2306188 | 3 | 12.10% |
| Q91VI7 | Rnh1     | 2  | 0.00016 | 0 | 0.00000 | 0.00   | 49816  | 4.69  | 0.02986843 | 1 | 2.60%  |
| Q3T998 | Akap13   | 2  | 0.00016 | 0 | 0.00000 | 0.00   | 303976 | 5.26  | -0.124618  | 1 | 0.40%  |
| Q31096 | H2-DMa   | 2  | 0.00016 | 0 | 0.00000 | 0.00   | 29056  | 4.6   | 0.16854411 | 1 | 8.00%  |
| Q9CY50 | Ssr1     | 2  | 0.00016 | 0 | 0.00000 | 0.00   | 32065  | 4.36  | -0.000909  | 2 | 14.30% |
| Q99N16 | Cyp4f3   | 3  | 0.00024 | 0 | 0.00000 | 0.00   | 59843  | 8.82  | 0.04135498 | 1 | 2.10%  |
| Q9CZM2 | Rpl15    | 2  | 0.00016 | 0 | 0.00000 | 0.00   | 24146  | 11.62 | -0.2967157 | 2 | 13.20% |
| A8DUK2 | Hbb-b1   | 11 | 0.00088 | 2 | 0.00021 | 5.50   | 15840  | 7.13  | 0.14292522 | 5 | 47.60% |
| Q9JHS9 | Cwc15    | 3  | 0.00024 | 0 | 0.00000 | 0.00   | 26624  | 5.54  | -0.421048  | 2 | 11.40% |
| Q9D1J1 | Necap2   | 3  | 0.00024 | 0 | 0.00000 | 0.00   | 28598  | 7.72  | -0.0177068 | 2 | 13.90% |
| Q9CX86 | Hnrnpa0  | 5  | 0.00040 | 0 | 0.00000 | 0.00   | 30530  | 9.35  | 0.03734424 | 3 | 14.10% |
| Q9CXD6 | Mcur1    | 3  | 0.00024 | 0 | 0.00000 | 0.00   | 37849  | 10.21 | -0.0686765 | 2 | 7.40%  |
| Q9JIY0 | Plekho1  | 3  | 0.00024 | 0 | 0.00000 | 0.00   | 45997  | 9.08  | -0.2460048 | 2 | 8.60%  |
| P63321 | Rala     | 5  | 0.00040 | 0 | 0.00000 | 0.00   | 23553  | 6.66  | -0.1676214 | 4 | 20.90% |
| P62900 | Rpl31    | 6  | 0.00048 | 0 | 0.00000 | 0.00   | 14463  | 10.54 | -0.2620801 | 2 | 18.40% |
| Q78IK4 | Apool    | 6  | 0.00048 | 0 | 0.00000 | 0.00   | 29261  | 9.34  | 0.00566036 | 3 | 16.20% |
| Q8R344 | Ccdc12   | 2  | 0.00016 | 0 | 0.00000 | 0.00   | 18891  | 6.69  | -0.380241  | 1 | 15.10% |
| Q9ESW4 | Agk      | 2  | 0.00016 | 0 | 0.00000 | 0.00   | 46976  | 8.65  | -0.0017577 | 3 | 15.20% |
| Q9D3W2 | Speer4d  | 2  | 0.00016 | 0 | 0.00000 | 0.00   | 25002  | 5.24  | -0.196085  | 1 | 6.10%  |
| Q9D967 | Mdp1     | 2  | 0.00016 | 0 | 0.00000 | 0.00   | 18582  | 6.29  | 0.02774389 | 1 | 7.90%  |
| Q9CQW2 | Arl8b    | 4  | 0.00032 | 0 | 0.00000 | 0.00   | 21539  | 8.67  | -0.0345161 | 1 | 4.80%  |
| Q8VE70 | Pdcd10   | 9  | 0.00072 | 4 | 0.00042 | 2.25   | 24716  | 7.8   | -0.0826887 | 6 | 33.50% |
| P42125 | Dci1     | 3  | 0.00024 | 0 | 0.00000 | 0.00   | 32250  | 9.12  | 0.00844293 | 4 | 20.40% |
| Q3U2S8 | Hvcn1    | 10 | 0.00080 | 4 | 0.00042 | 2.50   | 31242  | 6.57  | 0.06159845 | 5 | 24.20% |
| Q9DCE9 | Igtp     | 2  | 0.00016 | 0 | 0.00000 | 0.00   | 48494  | 7.63  | -0.0291253 | 3 | 10.20% |



|        |        |   |         |   |         |      |        |       |            |   |        |
|--------|--------|---|---------|---|---------|------|--------|-------|------------|---|--------|
| Q9DCS3 | Mecr   | 2 | 0.00016 | 0 | 0.00000 | 0.00 | 40343  | 9.17  | 0.06664876 | 1 | 4.00%  |
| P68040 | Gnb2l1 | 2 | 0.00016 | 0 | 0.00000 | 0.00 | 35077  | 7.6   | 0.03943218 | 1 | 7.60%  |
| Q9ERU9 | Ranbp2 | 2 | 0.00016 | 0 | 0.00000 | 0.00 | 341121 | 5.82  | -0.082378  | 5 | 2.00%  |
| Q9JM90 | Stap1  | 2 | 0.00016 | 0 | 0.00000 | 0.00 | 34628  | 8.55  | -0.1051515 | 1 | 7.70%  |
| P62918 | Rpl8   | 5 | 0.00040 | 2 | 0.00021 | 2.50 | 28025  | 11.04 | -0.1378211 | 3 | 14.40% |

**S4 Table: The list of reduced proteins in gp96 KO B cells.**

443 of proteins down-regulated in gp96 KO B cells were selected from 1425 probes based on MS/MS results. The selection cutoff was WT/KO larger or equal than 2. Enrichment GO annotation was done after
