# Supplementary material for: Mapping the Interactome of a Major Mammalian Endoplasmic Reticulum Heat Shock Protein 90
Source: PubMed Central journal article supplement (PMC5215799; doi:10.1371/journal.pone.0169260), 2017-01-05
Supplement: pone.0169260.s006.pdf [file pone.0169260.s006.pdf]

**S6 Table: gp96-associated proteins in preB cells**

| name      | proteinID   | Protein description                                                                                                             | score | expectation | MW     | coverage | empai  |
|-----------|-------------|---------------------------------------------------------------------------------------------------------------------------------|-------|-------------|--------|----------|--------|
| Birc6     | IPI00134095 | Birc6 baculoviral IAP repeat-containing 6                                                                                       | 211   | 4.80E-17    | 529085 | 2.3      | 0.04   |
| Lamc1     | IPI00400016 | Lamc1 Laminin subunit gamma-1                                                                                                   | 399   | 7.60E-36    | 177185 | 10.7     | 0.33   |
| Ugg1      | IPI00762897 | Ugg1 UDP-glucose:glycoprotein glucosyltransferase 1                                                                             | 1965  | 0           | 176322 | 43.4     | 3.25   |
| Pzp       | IPI00624663 | Pzp Putative uncharacterized protein Pzp                                                                                        | 340   | 5.30E-30    | 167177 | 14.5     | 0.39   |
| Mug1      | IPI00123223 | Mug1 Murinoglobulin-1                                                                                                           | 86    | 0.00014     | 165193 | 0.9      | 0.03   |
| Dsp       | IPI00553419 | Dsp desmoplakin                                                                                                                 | 540   | 5.40E-50    | 332706 | 14.4     | 0.36   |
| Man2b1    | IPI00381303 | Man2b1 Lysosomal alpha-mannosidase                                                                                              | 380   | 5.20E-34    | 114532 | 15.4     | 0.38   |
| Ganab     | IPI00115679 | Ganab Isoform 2 of Neutral alpha-glucosidase AB                                                                                 | 310   | 6.00E-27    | 109335 | 19.8     | 0.53   |
| Hyou1     | IPI00123342 | Hyou1 Hypoxia up-regulated protein 1                                                                                            | 264   | 2.30E-22    | 111112 | 27.2     | 0.4    |
| Lrpprc    | IPI00420706 | Lrpprc Leucine-rich PPR motif-containing protein, mitochondrial                                                                 | 144   | 2.30E-10    | 156516 | 5.4      | 0.16   |
| Hsp90ab1  | IPI00229080 | Hsp90ab1 Putative uncharacterized protein                                                                                       | 595   | 1.80E-55    | 83229  | 31.9     | 1.57   |
| Plod3     | IPI00127406 | Plod3 Procollagen-lysine,2-oxoglutarate 5-dioxygenase 3                                                                         | 480   | 6.20E-44    | 84869  | 27.5     | 1.26   |
| Hsp90aa1  | IPI00330804 | Hsp90aa1 Heat shock protein HSP 90-alpha                                                                                        | 366   | 1.50E-32    | 84735  | 16.8     | 0.46   |
| Trf       | IPI00139788 | Trf Serotransferrin                                                                                                             | 352   | 3.60E-31    | 76674  | 18.2     | 0.94   |
| Plod1     | IPI00127407 | Plod1 Procollagen-lysine,2-oxoglutarate 5-dioxygenase 1                                                                         | 314   | 2.10E-27    | 83542  | 20.3     | 0.74   |
| Hspa5     | IPI00319992 | Hspa5 78 kDa glucose-regulated protein                                                                                          | 4919  | 0           | 72377  | 68.9     | 224.28 |
| Pdia4     | IPI00271951 | Pdia4 protein disulfide-isomerase A4                                                                                            | 2189  | 0           | 72325  | 61.2     | 32.29  |
| Hspa8     | IPI00323357 | Hspa8 Heat shock cognate 71 kDa protein                                                                                         | 1057  | 1.10E-101   | 70827  | 36.4     | 3.19   |
| Glt25d1   | IPI00169870 | Glt25d1 Procollagen galactosyltransferase 1                                                                                     | 347   | 1.10E-30    | 71015  | 31.4     | 1.33   |
| Hspa9     | IPI00133903 | Hspa9 Stress-70 protein, mitochondrial                                                                                          | 274   | 2.10E-23    | 73483  | 19.3     | 0.87   |
| Clpx      | IPI00119808 | Clpx ATP-dependent Clp protease ATP-binding subunit clpX-like, mitochondrial                                                    | 292   | 3.70E-25    | 69271  | 19.9     | 0.49   |
| Dnajc3    | IPI00459033 | Dnajc3 DnaJ homolog subfamily C member 3                                                                                        | 596   | 1.50E-55    | 57428  | 49.6     | 3.24   |
| Kdelc1    | IPI00459134 | Kdelc1 Isoform 1 of KDEL motif-containing protein 1                                                                             | 531   | 4.30E-49    | 57948  | 46       | 3.18   |
| Sil1      | IPI00338561 | Sil1 Nucleotide exchange factor SIL1                                                                                            | 421   | 4.60E-38    | 52397  | 29.7     | 1.63   |
| Nucb1     | IPI00132314 | Nucb1 Nucleobindin-1                                                                                                            | 392   | 3.50E-35    | 53376  | 42.3     | 2.64   |
| Ero1l     | IPI00754386 | Ero1l ERO1-like protein alpha                                                                                                   | 308   | 9.10E-27    | 54050  | 21.8     | 0.98   |
| Dnajb11   | IPI00320241 | Dnajb11 DnaJ homolog subfamily B member 11                                                                                      | 514   | 2.20E-47    | 40530  | 37.7     | 3.87   |
| Got2      | IPI00117312 | Got2 Aspartate aminotransferase, mitochondrial                                                                                  | 253   | 2.70E-21    | 47381  | 14.2     | 0.62   |
| Actb      | IPI00110850 | Actb Actin, cytoplasmic 1                                                                                                       | 250   | 5.70E-21    | 41710  | 41.1     | 1.69   |
| Wnt10a    | IPI00112771 | Wnt10a Protein Wnt-10a                                                                                                          | 241   | 5.00E-20    | 46424  | 20.6     | 1.21   |
| Erp44     | IPI00134058 | Erp44 Endoplasmic reticulum resident protein 44                                                                                 | 216   | 1.40E-17    | 46823  | 29.3     | 1.42   |
| Lrpap1    | IPI00469307 | Lrpap1 Alpha-2-macroglobulin receptor-associated protein                                                                        | 203   | 2.60E-16    | 42189  | 31.1     | 1.14   |
| Actc1     | IPI00653007 | Actc1 Putative uncharacterized protein                                                                                          | 188   | 9.60E-15    | 42020  | 25.5     | 1.14   |
| LOC100046 | IPI00854971 | LOC100046302 similar to Protein disulfide isomerase associated 6                                                                | 169   | 6.70E-13    | 42831  | 21.7     | 0.53   |
| Aldoa     | IPI00221402 | Aldoa Fructose-bisphosphate aldolase A                                                                                          | 167   | 1.10E-12    | 39331  | 24.5     | 0.59   |
| Calu      | IPI00135186 | Calu Calumenin                                                                                                                  | 244   | 2.40E-20    | 37041  | 47       | 1.68   |
| Gm5507    | IPI00462075 | Gm5507 similar to Glycerinaldehyde-3-phosphate dehydrogenase                                                                    | 102   | 0.0000039   | 35771  | 16.7     | 0.67   |
| Gm5469    | IPI00461800 | Gm5469 similar to heterogeneous nuclear ribonucleoprotein A3, isoform 1                                                         | 101   | 0.0000042   | 37219  | 12.9     | 0.45   |
| ldh3a     | IPI00459725 | ldh3a Isoform 1 of Isocitrate dehydrogenase [NAD] subunit alpha, mitochondrial                                                  | 94    | 0.000025    | 39613  | 10.1     | 0.41   |
| Cnpy3     | IPI00119039 | Cnpy3 Isoform 1 of Protein canopy homolog 3                                                                                     | 287   | 1.10E-24    | 30519  | 26.4     | 2.83   |
| LOC100042 | IPI00620663 | LOC100042025 similar to Glycerinaldehyde-3-phosphate dehydrogenase (GAPDH) isoform 3                                            | 244   | 2.10E-20    | 31060  | 31.4     | 1.79   |
| Capza1    | IPI00330063 | Capza1 F-actin-capping protein subunit alpha-1                                                                                  | 237   | 1.10E-19    | 32919  | 28.7     | 1      |
| LOC100047 | IPI00406213 | LOC100047628 similar to Chain L, Structural Basis Of Antigen Mimicry In A Clinically Relevant Melanoma Antigen System isoform 1 | 172   | 3.70E-13    | 26145  | 11.8     | 0.41   |
| Necap2    | IPI00133798 | Necap2 Adaptin ear-binding coat-associated protein 2                                                                            | 157   | 1.00E-11    | 28580  | 19.2     | 0.89   |
| Rps3a     | IPI00331345 | Rps3a 40S ribosomal protein S3a                                                                                                 | 126   | 1.50E-08    | 29866  | 20.8     | 0.58   |
| Capzb     | IPI00269481 | Capzb Isoform 2 of F-actin-capping protein subunit beta                                                                         | 119   | 6.70E-08    | 30609  | 14.7     | 0.56   |
| Cd79a     | IPI00118409 | Cd79a B-cell antigen receptor complex-associated protein alpha chain                                                            | 100   | 0.0000053   | 24567  | 7.7      | 0.2    |
| Eef1b2    | IPI00320208 | Eef1b2 Elongation factor 1-beta                                                                                                 | 89    | 0.000066    | 24678  | 6.7      | 0.2    |
| Clpp      | IPI00133270 | Clpp Putative ATP-dependent Clp protease proteolytic subunit, mitochondrial                                                     | 468   | 9.50E-43    | 29781  | 39.7     | 4.39   |
| Cnpy4     | IPI00875961 | Cnpy4 Protein canopy homolog 4                                                                                                  | 466   | 1.40E-42    | 28076  | 48.2     | 5.99   |
| Erp29     | IPI00118832 | Erp29 Endoplasmic reticulum resident protein 29                                                                                 | 344   | 2.00E-30    | 28805  | 33.2     | 2.53   |
| Ywhaz     | IPI00116498 | Ywhaz 14-3-3 protein zeta/delta                                                                                                 | 286   | 1.60E-24    | 27754  | 34.3     | 2.15   |
| Ywhae     | IPI00118384 | Ywhae 14-3-3 protein epsilon                                                                                                    | 256   | 1.50E-21    | 29155  | 31.8     | 3.07   |
| Ywhab     | IPI00230682 | Ywhab Isoform Long of 14-3-3 protein beta/alpha                                                                                 | 193   | 2.90E-15    | 28069  | 24.8     | 1.25   |
| Ywhah     | IPI00227392 | Ywhah 14-3-3 protein eta                                                                                                        | 191   | 4.30E-15    | 28194  | 27.6     | 1.63   |
| Ywhaq     | IPI00408378 | Ywhaq Isoform 1 of 14-3-3 protein theta                                                                                         | 185   | 1.90E-14    | 27761  | 21.6     | 0.93   |
| Ywhag     | IPI00230707 | Ywhag 14-3-3 protein gamma                                                                                                      | 183   | 3.20E-14    | 28285  | 20.6     | 0.9    |
| Igl-V2    | IPI00678584 | Igl-V2 LOC207685 protein (Fragment)                                                                                             | 127   | 1.10E-08    | 24859  | 11.2     | 0.44   |
| Mesdc2    | IPI00349285 | Mesdc2 LDLR chaperone MESD                                                                                                      | 335   | 1.80E-29    | 25191  | 42.4     | 2.53   |
| Sdf2l1    | IPI00227657 | Sdf2l1 Stromal cell-derived factor 2-like protein 1                                                                             | 254   | 2.10E-21    | 23634  | 38       | 2.83   |
| Ppic      | IPI00130240 | Ppic Peptidyl-prolyl cis-trans isomerase C                                                                                      | 232   | 3.90E-19    | 22780  | 26.4     | 1.22   |
| Ppib      | IPI00135686 | Ppib Peptidyl-prolyl cis-trans isomerase B                                                                                      | 216   | 1.50E-17    | 23699  | 46.3     | 2.8    |

|            |              |                                                                           |     |           |        |      |      |
|------------|--------------|---------------------------------------------------------------------------|-----|-----------|--------|------|------|
| Igk-C      | IPI00556847  | Igk-C Igk protein                                                         | 199 | 7.50E-16  | 26285  | 25.9 | 0.68 |
| Igll1      | IPI00122759  | Igll1 Immunoglobulin lambda-like polypeptide 1                            | 181 | 4.10E-14  | 22847  | 33   | 1.69 |
| Tagln2     | IPI00125778  | Tagln2 Transgelin-2                                                       | 165 | 1.70E-12  | 22381  | 42.2 | 2.36 |
| Prdx1      | IPI00121788  | Prdx1 Peroxiredoxin-1                                                     | 160 | 5.60E-12  | 22162  | 29.6 | 1.77 |
| Cnpy2      | IPI00135512  | Cnpy2 Protein canopy homolog 2                                            | 146 | 1.50E-10  | 20754  | 28   | 1.39 |
| Gstp1      | IPI00555023  | Gstp1 Glutathione S-transferase P 1                                       | 109 | 7.50E-07  | 23594  | 18.1 | 0.78 |
| Manf       | IPI00110350  | Manf Mesencephalic astrocyte-derived neurotrophic factor                  | 70  | 0.0063    | 20361  | 16.2 | 0.95 |
| Hsp90b1    | IPI00129526  | Hsp90b1 Endoplasmic                                                       | 935 | 1.90E-89  | 92418  | 30.9 | 1.86 |
| Creld2     | IPI00111286  | Creld2 Cysteine-rich with EGF-like domain protein 2                       | 216 | 1.30E-17  | 38194  | 11.4 | 1.05 |
| Pdia6      | IPI00222496  | Pdia6 Putative uncharacterized protein                                    | 215 | 1.80E-17  | 48659  | 22.9 | 0.6  |
| Rcn1       | IPI00137831  | Rcn1 Reticulocalbin-1                                                     | 181 | 4.90E-14  | 38090  | 25.5 | 0.82 |
| Chid1      | IPI00405648  | Chid1 chitinase domain-containing protein 1 isoform 2                     | 166 | 1.60E-12  | 35518  | 17.4 | 0.67 |
| Eef1a1     | IPI00307837  | Eef1a1 Elongation factor 1-alpha 1                                        | 165 | 1.70E-12  | 50082  | 14.7 | 0.73 |
| Hspd1      | IPI00308885  | Hspd1 Isoform 1 of 60 kDa heat shock protein, mitochondrial               | 165 | 2.00E-12  | 60917  | 18.2 | 0.35 |
| P4hb       | IPI00122815  | P4hb Putative uncharacterized protein                                     | 165 | 1.70E-12  | 57023  | 24.6 | 0.18 |
| Rpsa       | IPI00123604  | Rpsa;LOC100045332 40S ribosomal protein SA                                | 163 | 3.20E-12  | 32817  | 10.8 | 0.32 |
| C3         | IPI00323624  | C3 Isoform Long of Complement C3 (Fragment)                               | 162 | 3.30E-12  | 186365 | 3.7  | 0.08 |
| Ctsd       | IPI001111013 | Ctsd Cathepsin D                                                          | 142 | 3.30E-10  | 44925  | 8    | 0.23 |
| Igk        | IPI00462809  | Igk Anti-colorectal carcinoma light chain                                 | 139 | 7.10E-10  | 26438  | 25.4 | 0.99 |
| Ybx1       | IPI00120886  | Ybx1 Nuclease-sensitive element-binding protein 1                         | 136 | 1.40E-09  | 35709  | 23   | 0.47 |
| Txndc5     | IPI00163011  | Txndc5 Thioredoxin domain-containing protein 5                            | 118 | 9.30E-08  | 46386  | 18.7 | 0.49 |
| Set        | IPI00410883  | Set Isoform 2 of Protein SET                                              | 110 | 5.20E-07  | 32086  | 19.5 | 0.53 |
| Acads      | IPI00885762  | Acads Protein                                                             | 107 | 0.000013  | 32593  | 8.6  | 0.15 |
| Hnrnpd     | IPI00330958  | Hnrnpd Isoform 1 of Heterogeneous nuclear ribonucleoprotein D0            | 104 | 0.000024  | 38330  | 6.5  | 0.27 |
| Pdia3      | IPI00230108  | Pdia3 Protein disulfide-isomerase A3                                      | 102 | 0.000037  | 56643  | 14.3 | 0.38 |
| Pofut1     | IPI00131488  | Pofut1 GDP-fucose protein O-fucosyltransferase 1                          | 101 | 0.000005  | 44660  | 9.4  | 0.23 |
| Eif4a1     | IPI00118676  | Eif4a1 Eukaryotic initiation factor 4A-I                                  | 93  | 0.000026  | 46125  | 12.1 | 0.35 |
| Tgfb1      | IPI00114457  | Tgfb1 Transforming growth factor beta-1                                   | 93  | 0.000031  | 44282  | 14.6 | 0.36 |
| Ighg1      | IPI00308213  | Ighg1 Ig gamma-1 chain C region, membrane-bound form                      | 92  | 0.000034  | 43359  | 25.7 | 0.24 |
| Hnrnpab    | IPI00117288  | Hnrnpab Heterogeneous nuclear ribonucleoprotein A/B                       | 86  | 0.00014   | 30812  | 4.9  | 0.16 |
| Psmc5      | IPI00135640  | Psmc5 26S protease regulatory subunit 8                                   | 84  | 0.00021   | 45597  | 3.2  | 0.11 |
| Pcbp1      | IPI00128904  | Pcbp1 Poly(rC)-binding protein 1                                          | 81  | 0.00042   | 37474  | 8.7  | 0.13 |
| Fh1        | IPI00129928  | Fh1 Isoform Mitochondrial of Fumarate hydratase, mitochondrial            | 73  | 0.0026    | 54336  | 6.3  | 0.18 |
| 2210010C04 | IPI00131674  | 2210010C04Rik trypsinogen 7                                               | 73  | 0.0026    | 26405  | 8.1  | 0.19 |
| Htr3a      | IPI00222698  | Htr3a 5-hydroxytryptamine receptor 3A isoform 1                           | 68  | 0.0086    | 56189  | 11   | 0.18 |
| Acaa2      | IPI00226430  | Acaa2 3-ketoacyl-CoA thiolase, mitochondrial                              | 67  | 0.012     | 41831  | 7.6  | 0.12 |
| Rpl3       | IPI00321170  | Rpl3 60S ribosomal protein L3                                             | 62  | 0.035     | 46095  | 4.7  | 0.1  |
| Ctse       | IPI00137542  | Ctse Cathepsin E                                                          | 62  | 0.039     | 42905  | 2.5  | 0.11 |
| Psmc6      | IPI00125971  | Psmc6 26S protease regulatory subunit S10B                                | 61  | 0.041     | 44145  | 3.9  | 0.11 |
| Poldip2    | IPI00126634  | Poldip2 Polymerase delta-interacting protein 2                            | 192 | 3.80E-15  | 41844  | 13.3 | 0.73 |
| Capza2     | IPI00111265  | Capza2 F-actin-capping protein subunit alpha-2                            | 151 | 4.40E-11  | 32947  | 24.5 | 0.74 |
| Mdh2       | IPI00323592  | Mdh2 Malate dehydrogenase, mitochondrial                                  | 129 | 6.40E-09  | 35589  | 33.4 | 0.67 |
| Adprh      | IPI00111149  | Adprh [Protein ADP-ribosylarginine] hydrolase                             | 100 | 0.0000054 | 40042  | 15.2 | 0.41 |
| Rplp0      | IPI00314950  | Rplp0 60S acidic ribosomal protein P0                                     | 89  | 0.000077  | 34195  | 8.5  | 0.31 |
| Ctso       | IPI00453524  | Ctso Cathepsin O                                                          | 86  | 0.00014   | 34701  | 5.8  | 0.3  |
| Eef1d      | IPI00118875  | Eef1d Isoform 1 of Elongation factor 1-delta                              | 86  | 0.00014   | 31274  | 6.8  | 0.16 |
| Tcrb-V20   | IPI00130391  | Tcrb-V20;Prss3;Prss1 protease, serine, 1                                  | 82  | 0.00038   | 26118  | 13.8 | 0.69 |
| Hnrmpa2b1  | IPI00405058  | Hnrmpa2b1 Isoform 3 of Heterogeneous nuclear ribonucleoproteins A2/B1     | 79  | 0.00064   | 32440  | 9.3  | 0.53 |
| Ctsz       | IPI00125220  | Ctsz Cathepsin Z                                                          | 77  | 0.0011    | 34153  | 3.3  | 0.14 |
| Npm1       | IPI00127415  | Npm1 Nucleophosmin                                                        | 75  | 0.0017    | 32540  | 15.4 | 0.52 |
| Hba-a1     | IPI00110658  | Hba-a1;Hba-a2 Putative uncharacterized protein                            | 72  | 0.0033    | 15193  | 10.6 | 0.34 |
| Nxph4      | IPI00224986  | Nxph4 Putative uncharacterized protein                                    | 71  | 0.0048    | 23109  | 7.9  | 0.22 |
| Ldha       | IPI00319994  | Ldha L-lactate dehydrogenase A chain                                      | 178 | 9.60E-14  | 36475  | 25   | 0.87 |
| Sumf2      | IPI00223483  | Sumf2 Sulfatase-modifying factor 2                                        | 136 | 1.40E-09  | 34685  | 13.3 | 0.3  |
| Jup        | IPI00229475  | Jup Junction plakoglobin                                                  | 78  | 0.00081   | 81749  | 5.9  | 0.12 |
| Eef1a2     | IPI00119667  | Eef1a2 Elongation factor 1-alpha 2                                        | 74  | 0.0024    | 50422  | 4.1  | 0.2  |
| Gm5409     | IPI00395100  | Gm5409 Try10-like trypsinogen                                             | 73  | 0.0032    | 26514  | 8.1  | 0.19 |
| Pycr2      | IPI00123278  | Pycr2 Pyrroline-5-carboxylate reductase 2                                 | 67  | 0.01      | 33638  | 7.5  | 0.15 |
| Cd79b      | IPI00131458  | Cd79b CD79B antigen                                                       | 61  | 0.042     | 32113  | 4.9  | 0.15 |
| Gm15500    | IPI00308706  | Gm15500;Rpl5 60S ribosomal protein L5                                     | 61  | 0.047     | 34379  | 4.7  | 0.14 |
| Anxa2      | IPI00468203  | Anxa2 Annexin A2                                                          | 61  | 0.049     | 38652  | 5.9  | 0.13 |
| Pnp        | IPI00315452  | Pnp Purine nucleoside phosphorylase                                       | 109 | 6.50E-07  | 32256  | 14.9 | 0.53 |
| Prdx4      | IPI00116254  | Prdx4 Peroxiredoxin-4                                                     | 76  | 0.0016    | 31033  | 8.8  | 0.34 |
| Etfb       | IPI00121440  | Etfb Electron transfer flavoprotein subunit beta                          | 67  | 0.011     | 27606  | 3.9  | 0.18 |
| Ccdc134    | IPI00226901  | Ccdc134 Isoform 1 of Coiled-coil domain-containing protein 134            | 64  | 0.023     | 26478  | 18.3 | 0.19 |
| Gm13891    | IPI00474637  | Gm13891;Rpl10;Gm10041;LOC100048462;LOC100048223 60S ribosomal protein L10 | 96  | 0.000014  | 24588  | 6.1  | 0.2  |
| Psmb1      | IPI00113845  | Psmb1 Proteasome subunit beta type-1                                      | 87  | 0.00011   | 26355  | 9.6  | 0.19 |
| Gm9385     | IPI00134202  | Gm9385 similar to ribosomal protein L24                                   | 77  | 0.0011    | 12210  | 20.2 | 0.44 |
| Psmb3      | IPI00314467  | Psmb3 Proteasome subunit beta type-3                                      | 75  | 0.0018    | 22949  | 6.8  | 0.22 |
| Rpl23a     | IPI00461456  | Rpl23a;Gm10132 60S ribosomal protein L23a                                 | 74  | 0.0021    | 17684  | 15.4 | 0.29 |
| Dnajb9     | IPI00136218  | Dnajb9 DnaJ homolog subfamily B member 9                                  | 70  | 0.0063    | 25720  | 10.4 | 0.42 |

|            |             |                                                                                    |     |           |        |      |      |
|------------|-------------|------------------------------------------------------------------------------------|-----|-----------|--------|------|------|
| Hspa1b     | IPI00346073 | Hspa1b Heat shock 70 kDa protein 1B                                                | 67  | 0.012     | 70133  | 4.5  | 0.07 |
| Calr       | IPI00123639 | Calr Calreticulin                                                                  | 95  | 0.00002   | 47965  | 10.1 | 0.21 |
| Igh-6      | IPI00177214 | Igh-6 Ig mu chain C region membrane-bound form                                     | 92  | 0.000039  | 52494  | 7.8  | 0.19 |
| Plch1      | IPI00338999 | Plch1 Isoform 2 of 1-phosphatidylinositol-4,5-bisphosphate phosphodiesterase eta-1 | 75  | 0.002     | 182823 | 0.9  | 0.05 |
| Prkcsb     | IPI00115680 | Prkcsb Isoform 1 of Glucosidase 2 subunit beta                                     | 70  | 0.006     | 58756  | 6    | 0.17 |
| Cp         | IPI00117831 | Cp Ceruloplasmin                                                                   | 90  | 0.000054  | 121074 | 6.6  | 0.12 |
| Srrt       | IPI00224644 | Srrt Isoform C of Serrate RNA effector molecule homolog                            | 101 | 0.0000047 | 99378  | 8.1  | 0.1  |
| Hnrmpu     | IPI00458583 | Hnrmpu Heterogeneous nuclear ribonucleoprotein U                                   | 196 | 1.60E-15  | 87863  | 11.6 | 0.23 |
| Ttc13      | IPI00895079 | Ttc13 94 kDa protein                                                               | 111 | 4.70E-07  | 93777  | 4    | 0.16 |
| Dnajc10    | IPI00229600 | Dnajc10 dnaJ homolog subfamily C member 10                                         | 217 | 1.20E-17  | 90525  | 32.3 | 0.67 |
| H6pd       | IPI00222809 | H6pd Hexose-6-phosphate dehydrogenase                                              | 303 | 2.70E-26  | 89853  | 18.2 | 0.51 |
| Pkp1       | IPI00124111 | Pkp1 Plakophilin-1                                                                 | 98  | 0.0000092 | 80844  | 5.4  | 0.06 |
| Caprin1    | IPI00121515 | Caprin1 caprin-1 isoform c                                                         | 95  | 0.000017  | 76617  | 3.3  | 0.13 |
| Pros1      | IPI00124374 | Pros1 Vitamin K-dependent protein S                                                | 110 | 5.30E-07  | 74886  | 7.4  | 0.2  |
| Wrnip1     | IPI00459468 | Wrnip1 Isoform 1 of ATPase WRNIP1                                                  | 303 | 2.60E-26  | 71749  | 23.3 | 0.9  |
| Lcp1       | IPI00118892 | Lcp1 Plastin-2                                                                     | 176 | 1.30E-13  | 70105  | 11   | 0.48 |
| Os9        | IPI00230353 | Os9 Isoform 2 of Protein OS-9                                                      | 242 | 3.30E-20  | 69721  | 17.8 | 0.59 |
| Ddx5       | IPI00420363 | Ddx5 Probable ATP-dependent RNA helicase DDX5                                      | 101 | 0.0000048 | 69277  | 9.4  | 0.31 |
| Rpn1       | IPI00309035 | Rpn1 Dolichyl-diphosphooligosaccharide--protein glycosyltransferase subunit 1      | 62  | 0.034     | 68486  | 7.4  | 0.14 |
| Canx       | IPI00119618 | Canx Calnexin                                                                      | 71  | 0.0051    | 67236  | 5.9  | 0.15 |
| Tkt        | IPI00137409 | Tkt Transketolase                                                                  | 128 | 8.10E-09  | 67588  | 17.5 | 0.41 |
| Eif3l      | IPI00463573 | Eif3l Eukaryotic translation initiation factor 3 subunit L                         | 134 | 2.40E-09  | 66570  | 11.2 | 0.32 |
| Nop56      | IPI00318048 | Nop56 Nucleolar protein 56                                                         | 109 | 7.10E-07  | 64424  | 9    | 0.24 |
| Fga        | IPI00115522 | Fga fibrinogen, alpha polypeptide isoform 2                                        | 74  | 0.0023    | 61288  | 4.3  | 0.16 |
| Cct3       | IPI00116283 | Cct3 T-complex protein 1 subunit gamma                                             | 99  | 0.0000079 | 60591  | 16.7 | 0.36 |
| 4732456N10 | IPI00222228 | 4732456N10Rik hypothetical protein LOC239673                                       | 415 | 1.90E-37  | 58188  | 9.9  | 1.04 |
| Plekho2    | IPI00403031 | Plekho2 Pleckstrin homology domain-containing family O member 2                    | 137 | 1.20E-09  | 53839  | 9.5  | 0.41 |
| Serpina3k  | IPI00131830 | Serpina3k Serine protease inhibitor A3K                                            | 238 | 8.40E-20  | 46850  | 26.3 | 0.63 |
| Hnrnpk     | IPI00223253 | Hnrnpk Isoform 1 of Heterogeneous nuclear ribonucleoprotein K                      | 187 | 1.20E-14  | 50944  | 22.5 | 0.88 |
| Kdelc2     | IPI00344686 | Kdelc2 KDEL (Lys-Asp-Glu-Leu) containing 2 protein                                 | 172 | 3.20E-13  | 57650  | 17.1 | 0.38 |
| Cct6a      | IPI00116281 | Cct6a T-complex protein 1 subunit zeta                                             | 131 | 4.10E-09  | 57968  | 13.7 | 0.49 |
| Pcyox1l    | IPI00226726 | Pcyox1l Prenylcysteine oxidase-like                                                | 129 | 6.50E-09  | 54840  | 9.5  | 0.29 |
| Btd        | IPI00321375 | Btd biotinidase                                                                    | 111 | 4.50E-07  | 59240  | 9.1  | 0.36 |
| Alb        | IPI00131695 | Alb Serum albumin                                                                  | 75  | 0.0016    | 68648  | 10.9 | 0.14 |
| C4b        | IPI00131091 | C4b Complement C4-B                                                                | 65  | 0.02      | 192764 | 3.2  | 0.02 |
| 9530053A07 | IPI00227522 | 9530053A07Rik Fc fragment of IgG binding protein-like                              | 61  | 0.044     | 280044 | 4.3  | 0.02 |
| Dsg1b      | IPI00380460 | Dsg1b Desmoglein-1-beta                                                            | 128 | 8.80E-09  | 114382 | 3.7  | 0.22 |
| Ckm        | IPI00127596 | Ckm Creatine kinase M-type                                                         | 78  | 0.00099   | 43018  | 10.8 | 0.11 |
| Pof1b      | IPI00135996 | Pof1b Protein POF1B                                                                | 75  | 0.0019    | 68459  | 3.5  | 0.07 |
| Aco2       | IPI00116074 | Aco2 Aconitate hydratase, mitochondrial                                            | 123 | 2.80E-08  | 85410  | 8.7  | 0.24 |
| Pfkb       | IPI00124444 | Pfkb Isoform 1 of 6-phosphofructokinase type C                                     | 91  | 0.00005   | 85400  | 4.7  | 0.06 |
| Aldh18a1   | IPI00129350 | Aldh18a1 Isoform Long of Delta-1-pyrroline-5-carboxylate synthase                  | 85  | 0.00019   | 87242  | 9.8  | 0.17 |
| Foxred2    | IPI00132825 | Foxred2 FAD-dependent oxidoreductase domain-containing protein 2                   | 66  | 0.013     | 75956  | 3.3  | 0.06 |
| P4ha1      | IPI00272381 | P4ha1 Putative uncharacterized protein                                             | 208 | 8.70E-17  | 63769  | 10.7 | 0.54 |
| Me2        | IPI00115977 | Me2 NAD-dependent malic enzyme, mitochondrial                                      | 160 | 6.20E-12  | 65757  | 16   | 0.52 |
| LOC100046  | IPI00330303 | LOC100046995;Atic Bifunctional purine biosynthesis protein PURH                    | 86  | 0.00013   | 64177  | 6.4  | 0.24 |
| Yy1        | IPI00311892 | Yy1 Transcriptional repressor protein YY1                                          | 85  | 0.00016   | 44689  | 8    | 0.23 |
| Syncrip    | IPI00406117 | Syncrip Isoform 1 of Heterogeneous nuclear ribonucleoprotein Q                     | 84  | 0.0002    | 69590  | 6.1  | 0.14 |
| Sdha       | IPI00230351 | Sdha Succinate dehydrogenase [ubiquinone] flavoprotein subunit, mitochondrial      | 76  | 0.0013    | 72539  | 4.1  | 0.14 |
| Pck2       | IPI00223060 | Pck2 phosphoenolpyruvate carboxykinase [GTP], mitochondrial                        | 69  | 0.0066    | 73371  | 8.1  | 0.13 |
| Krt18      | IPI00311493 | Krt18 Keratin, type I cytoskeletal 18                                              | 62  | 0.034     | 47509  | 7.1  | 0.34 |
| Angptl2    | IPI00126864 | Angptl2 Angiopoietin-related protein 2                                             | 297 | 1.10E-25  | 57082  | 26   | 1.07 |
| Tuba1a     | IPI00110753 | Tuba1a Tubulin alpha-1A chain                                                      | 277 | 1.20E-23  | 50104  | 36.8 | 1.74 |
| Tubb2c     | IPI00169463 | Tubb2c Tubulin beta-2C chain                                                       | 204 | 2.10E-16  | 49799  | 27.4 | 1.09 |
| Tuba4a     | IPI00117350 | Tuba4a Tubulin alpha-4A chain                                                      | 199 | 6.70E-16  | 49892  | 38.8 | 1.29 |
| Tubb2b     | IPI00109061 | Tubb2b Tubulin beta-2B chain                                                       | 165 | 1.70E-12  | 49921  | 24.7 | 0.9  |
| Ighg       | IPI00896683 | Ighg:Igh-1a:Igh-1b similar to Ig gamma-2b chain membrane isoform 1                 | 149 | 6.60E-11  | 47138  | 15.8 | 0.34 |
| Pkm2       | IPI00407130 | Pkm2 Isoform M2 of Pyruvate kinase isozymes M1/M2                                  | 120 | 6.20E-08  | 57808  | 18.5 | 0.61 |
| Cct5       | IPI00116279 | Cct5 T-complex protein 1 subunit epsilon                                           | 108 | 8.60E-07  | 59586  | 15.7 | 0.36 |
| Cct7       | IPI00331174 | Cct7 T-complex protein 1 subunit eta                                               | 108 | 9.40E-07  | 59614  | 7.4  | 0.26 |
| Cct4       | IPI00116277 | Cct4 T-complex protein 1 subunit delta                                             | 102 | 0.0000038 | 58030  | 10.2 | 0.49 |
| Gba        | IPI00108811 | Gba Glucosylceramidase                                                             | 91  | 0.00004   | 57585  | 6.6  | 0.17 |
| Gm12141    | IPI00749932 | Gm12141 similar to Heat shock protein 1                                            | 91  | 0.000045  | 56670  | 11.1 | 0.18 |
| Colq       | IPI00761778 | Colq Acetylcholinesterase collagenic tail peptide                                  | 87  | 0.00012   | 47653  | 6.6  | 0.1  |
| Coro1a     | IPI00323600 | Coro1a Coronin-1A                                                                  | 79  | 0.0008    | 50957  | 8.9  | 0.09 |

|         |             |                                                                               |    |        |       |    |      |
|---------|-------------|-------------------------------------------------------------------------------|----|--------|-------|----|------|
| Gm10284 | IPI00849049 | Gm10284 similar to Glyceraldehyde-3-phosphate dehydrogenase (GAPDH) isoform 2 | 69 | 0.0074 | 31120 | 11 | 0.16 |
| Fgb     | IPI00279079 | Fgb Fibrinogen beta chain                                                     | 67 | 0.012  | 54718 | 11 | 0.29 |
| Nap111  | IPI00123199 | Nap111 Nucleosome assembly protein 1-like 1                                   | 61 | 0.044  | 45317 | 9  | 0.11 |

**S6 Table: gp96-associated proteins in preB cells.** 811 clean entries were detected from Immunoprecipitation method. A total of 201 genes were selected from those 811 genes with expectation value small than 0.05.
